# Supplementary material for: Daily activity patterns influence retinal morphology, signatures of selection, and spectral tuning of opsin genes in colubrid snakes
Source: PubMed Central journal article supplement (PMC5725783; doi:10.1186/s12862-017-1110-0), 2017-12-11
Supplement: 12862_2017_1110_MOESM1_ESM.pdf [file 12862_2017_1110_MOESM1_ESM.pdf]

**Daily activity patterns influence retinal morphology, signatures of selection, and spectral tuning of opsin genes in colubrid snakes.**

Hauzman E, Bonci DMO, Suárez-Villota EY; Neitz M, Ventura DF

**Additional file 1 with Tables S1-S7 and Figures S1-S2.**

Table S1. Primers designed and used in this study, to amplify the opsin genes *LWS*, *RH1* and *SWS1*, expressed in retinas of Colubridae snakes.

| Primer              | Opsin | Annealing Temperature | Nucleotide Sequence                |
|---------------------|-------|-----------------------|------------------------------------|
| <i>SquaLWSFw</i>    | LWS   | 59.5                  | 5' ATGACAGAGGCCTGGAATGT 3'         |
| <i>SquaLWSRv</i>    | LWS   | 60.0                  | 5' CCTTGCTGGCATTCTTTCT 3'          |
| <i>LWS DipsFw</i>   | LWS   | 62.0                  | 5' CTCGTACCCATCAAGTACAAGAAGT 3'    |
| <i>LWS DipsRv</i>   | LWS   | 62.0                  | 5' GTCTTCTGAGAGCTCAGGTCAGACT 3'    |
| <i>LWS DegFw</i>    | LWS   | 62.4                  | 5' GRYCCTTTTGAAGGYCCAAAYTAYC 3'    |
| <i>LWS DegRv</i>    | LWS   | 62.8                  | 5' GTTGAAATGGTKGCGCTTTTTG 3'       |
| <i>LWS TdorFw</i>   | LWS   | 61.6                  | 5' TTTACTTACACCAACAGCAACAATACC 3'  |
| <i>LWS TdorRv</i>   | LWS   | 61.5                  | 5' TTCATGAAGACATAGATAAATTGGGTTG 3' |
| <i>LWS LpoeFw</i>   | LWS   | 62.5                  | 5' GTGTATTTGCTTACACCAATAGCAACA 3'  |
| <i>LWS LpoeRv</i>   | LWS   | 63.4                  | 5' AAAATGTATATGGTCCCCAGCAGAC 3'    |
| <i>SquaRH1Fw</i>    | RH1   | 59.9                  | 5' GCATTGTTCCGAGTCCATTT 3'         |
| <i>SquaRH1Rv</i>    | RH1   | 62.5                  | 5' TTCTGCTGGCACCAAGACAG 3'         |
| <i>RH1SmikFw</i>    | RH1   | 65.8                  | 5' TATTTGGCAGATCCATGGAAATATTCTG 3' |
| <i>RH1SmikRv</i>    | RH1   | 66.1                  | 5' GGGGAAACCTTACTTGTGGAGACTGTAG 3' |
| <i>RH1OxyFw</i>     | RH1   | 64.5                  | 5' GTCACCATCCAACACAAGAACTCA 3'     |
| <i>RH1OxyRv</i>     | RH1   | 64.0                  | 5' AAATCACTGGGTTGTAGATTGAAGAGC 3'  |
| <i>RH1Tdor1Fw</i>   | RH1   | 60.0                  | 5' CACCACTACCATGTACACTTCCAT 3'     |
| <i>RH1Tdor1Rv</i>   | RH1   | 60.0                  | 5' GTCATAAAGACAGGGCCAAAGT 3'       |
| <i>RH1Tdor2Fw</i>   | RH1   | 60.0                  | 5' CAAGAACTCAGAACACCTCTGAA 3'      |
| <i>RH1Tdor2Rv</i>   | RH1   | 60.0                  | 5' CGGAACTGTTTGTTTATTACGATA 3'     |
| <i>SquaSWS1Fw</i>   | SWS1  | 55.6                  | 5' CCTCTTTGAAAACATCTCCTC 3'        |
| <i>SquaSWS1Rv</i>   | SWS1  | 59.8                  | 5' GTCCTCCTGTCAAGTCAGCC 3'         |
| <i>SWS1ArtfFw</i>   | SWS1  | 64.0                  | 5' GACGGTCCCCAGTATCACATTG 3'       |
| <i>SWS1ArtfRv</i>   | SWS1  | 64.7                  | 5' CTTGACAGGAGGACACTGAGGAAAC 3'    |
| <i>SWS1 TdorFw</i>  | SWS1  | 63.7                  | 5' CTTTCCACTTCAAACCATCTTCAT 3'     |
| <i>SWS1 TdorRv</i>  | SWS1  | 63.4                  | 5' TTCTGAGAAGTCACATCAGAGTCGT 3'    |
| <i>SWS1 Tdor2Fw</i> | SWS1  | 64.8                  | 5' ATCCTCTTCGTCACCATCAAGTACAAG 3'  |
| <i>SWS1 Tdor2Rv</i> | SWS1  | 64.1                  | 5' ATGAAGCAGTAGATGATGGGGTTGT 3'    |
| <i>SWS1 DipsFw</i>  | SWS1  | 62.0                  | 5' TACCACCAGGAGAGTGTATTTGTGTA 3'   |
| <i>SWS1 DipsRv</i>  | SWS1  | 62.0                  | 5' ACTTTCTTGCCAAAGAGCTGCATTAT 3'   |

Table S2. Species used as outgroups for phylogenetic analysis and respective GenBank accession numbers.

| Comon name  | Species                          | GenBank acesion number |            |             |             |             |
|-------------|----------------------------------|------------------------|------------|-------------|-------------|-------------|
|             |                                  | RH1                    | RH2        | SWS1        | SWS2        | LWS/MWS     |
| Salamander  | <i>Ambystoma tigrinum</i>        | Q90245                 | -          | -           | AF038946    | -           |
| Worm lizard | <i>Amphisbaena alba</i>          | KR336729               | -          | KR336720    | -           | KR336705    |
| Worm lizard | <i>Amphisbaena infraorbitale</i> | KR336730               | -          | KR336719    | -           | KR336704    |
| Lizard      | <i>Anolis carolinensis</i>       | NM001291387            | AF134189   | AH007736    | -           | P41592      |
| Lizard      | <i>Bachia flavescens</i>         | KR336731               | -          | KR336715    | -           | KR336703    |
| Cow         | <i>Bos taurus</i>                | NM001014890            | -          | NP776992    | -           | AAG49893    |
| Goldfish    | <i>Carassius auratus</i>         | L11863                 | -          | Q90309      | -           | L11867      |
| Pigeon      | <i>Columba livia</i>             | -                      | AH007731   | AH007798    | -           | -           |
| Zebrafish   | <i>Danio rerio</i>               | NP571287               | Q9W6A6     | Q9W6A9      | BAC24133    | NM001002443 |
| Chicken     | <i>Gallus gallus</i>             | P22328                 | P28683     | P28684      | P28682      | P22329      |
| Lizard      | <i>Gekko gekko</i>               | -                      | -          | P35357      | -           | P35358      |
| Lamprey     | <i>Geotria australis</i>         | AAR14682               | AAR14683   | AY366495    | AAR14681    | AY366491    |
| Gorilla     | <i>Gorilla gorilla</i>           | XM004036292            | -          | XM004046176 | -           | -           |
| Human       | <i>Homo sapien</i>               | NP00530                | -          | P03999      | -           | NM020061.5  |
| Coelacanth  | <i>Latimeria chalumnae</i>       | -                      | AF131258   | -           | -           | -           |
| Lizard      | <i>Melanoseps occidentalis</i>   | KR336743               | -          | KR336718    | -           | KR336713    |
| Mouse       | <i>Mus musculus</i>              | NP663358               | -          | P51491      | -           | O35599      |
| Lungfish    | <i>Neoceratodus forsteri</i>     | EF526295               | EF526296   | EF526298    | -           | EF526297    |
| Platypus    | <i>Ornithorhynchus anatinus</i>  | -                      | -          | -           | ABN43075    | -           |
| Day Gecko   | <i>Phelsuma madagascariensis</i> | -                      | AF074044   | AAD45183    | -           | AAD25917    |
| Rat         | <i>Rattus norvegicus</i>         | NM033441               | -          | NM031015    | -           | NM053548    |
| Fish        | <i>Scleropages formosus</i>      | XM018762271            | -          | XM018755948 | -           | XM018725556 |
| Canary      | <i>Serinus canaria</i>           | XM009099359            | -          | AY227178    | -           | XM009100678 |
| Boar        | <i>Sus scrofa</i>                | NM214221               | -          | NM214090    | -           | NM001011506 |
| Zebra finch | <i>Taeniopygia guttata</i>       | AF222329               | NM00107669 | AF222331    | NM001076697 | AF222333    |
| Lizard      | <i>Takydromus sexlineatus</i>    | KR336727               | -          | KR336722    | -           | KR336707    |
| Lizard      | <i>Uta stansburiana</i>          | DQ100323               | DQ100324   | DQ100325    | DQ100326    | DQ129869    |
| Frog        | <i>Xenopus laevis</i>            | AAC42232               | -          | P51473      | AAO38746    | U90895      |
| Frog        | <i>Xenopus tropicalis</i>        | NM00109733             | -          | NM001126076 | -           | NM001102861 |

Table S3. Colubridae species used for phylogenetic and evolutionary analysis and respective GenBank accession numbers. In bold, species sequenced in this study.

| Family                                 | Subfamily                                 | Species                                | GenBank Accession Number |                 |                 |
|----------------------------------------|-------------------------------------------|----------------------------------------|--------------------------|-----------------|-----------------|
|                                        |                                           |                                        | LWS                      | RH1             | SWS1            |
| Colubridae                             | Colubrinae                                | <i>Ahaetulla nasuta</i>                | KX237798                 | KX237852        | KX237906        |
|                                        |                                           | <i>Arizona elegans</i>                 | KU323986                 | KU324006        | KU323997        |
|                                        |                                           | <i>Bogertophis subocularis</i>         | KX237822                 | KX237844        | KX237920        |
|                                        |                                           | <i>Boiga ceylonensis</i>               | KX237819                 | -               | -               |
|                                        |                                           | <i>Boiga forsteni</i>                  | KX237818                 | KX237867        | -               |
|                                        |                                           | <i>Chironius carinatus</i>             | KX237795                 | KX237846        | KX237914        |
|                                        |                                           | <b><i>Chironius bicarinatus</i></b>    | <b>MG544928</b>          | <b>MG544945</b> | <b>MG544962</b> |
|                                        |                                           | <i>Chironius fuscus</i>                | KX237794                 | KX237845        | KX237913        |
|                                        |                                           | <i>Chrysopelea ornata</i>              | KX237799                 | KX237851        | KX237907        |
|                                        |                                           | <i>Dasypeltis scabra</i>               | KX237821                 | KX237856        | KX237908        |
|                                        |                                           | <i>Elaphe climacophora</i>             | KX237817                 | KX237845        | KX237917        |
|                                        |                                           | <i>Hemorrhois hippocrepis</i>          | KX237911                 | KX237835        | KX237911        |
|                                        |                                           | <i>Lampropeltis californiae</i>        | KX237825                 | KX237858        | KX237921        |
|                                        |                                           | <i>Lampropeltis floridana</i>          | KX237826                 | KX237857        | KX237922        |
|                                        |                                           | <i>Lycodon aulicus</i>                 | KX237820                 | KX237875        | KX237915        |
|                                        |                                           | <i>Macroprotodon brevis</i>            | KX237815                 | -               | KX237909        |
|                                        |                                           | <i>Opheodrys aestivus</i>              | KX237797                 | KX237839        | KX237912        |
|                                        |                                           | <i>Orthriophis taeniurus</i>           | KX237816                 | KX237862        | KX237916        |
|                                        |                                           | <i>Pantherophis guttatus</i>           | KX237824                 | KX237863        | KX237918        |
|                                        |                                           | <i>Phyllorhynchus decurtatus</i>       | KU323985                 | -               | KU323996        |
|                                        |                                           | <i>Pituophis catenifer</i>             | KX237823                 | KX237854        | KX237919        |
|                                        |                                           | <i>Pseustes poecilonotus</i>           | KR336711                 | KR336741        | KR336725        |
|                                        |                                           | <i>Spalerosophis diadema</i>           | KX237814                 | KX237853        | KX237910        |
|                                        |                                           | <b><i>Spilotes pullatus</i></b>        | <b>MG544940</b>          | <b>MG544957</b> | <b>MG544974</b> |
|                                        |                                           | <i>Telescopus fallax</i>               | KU323984                 | KU324005        | KU323995        |
|                                        |                                           | <i>Atractus flammigerus</i>            | KR336712                 | KR336740        | KR336726        |
|                                        |                                           | <i>Atractus badius</i>                 | KX237809                 | KX237842        | KX237902        |
|                                        | <b><i>Atractus reticulatus</i></b>        | <b>MG544927</b>                        | <b>MG544944</b>          | <b>MG544961</b> |                 |
|                                        | <i>Dipsas indica</i>                      | KX237813                               | KX237849                 | KX237904        |                 |
|                                        | <i>Dipsas catesbyi</i>                    | KX237812                               | KX237848                 | KX237905        |                 |
|                                        | <b><i>Dipsas petersi</i></b>              | <b>MG544929</b>                        | <b>MG544946</b>          | <b>MG544963</b> |                 |
|                                        | <b><i>Echinanthera cephalostriata</i></b> | <b>MG544930</b>                        | <b>MG544947</b>          | <b>MG544964</b> |                 |
|                                        | <b><i>Echinanthera undulata</i></b>       | <b>MG544931</b>                        | <b>MG544948</b>          | <b>MG544965</b> |                 |
|                                        | <b><i>Erythrolamprus aesculapii</i></b>   | <b>MG544932</b>                        | <b>MG544949</b>          | <b>MG544966</b> |                 |
|                                        | <b><i>Erythrolamprus miliaris</i></b>     | <b>MG544933</b>                        | <b>MG544950</b>          | <b>MG544967</b> |                 |
|                                        | <b><i>Erythrolamprus poecilogyrus</i></b> | <b>MG544934</b>                        | <b>MG544951</b>          | <b>MG544968</b> |                 |
|                                        | <i>Erythrolamprus reginae</i>             | KX237800                               | KX237855                 | KX237894        |                 |
|                                        | <i>Helicops angulatus</i>                 | KX237806                               | KX237836                 | KX237895        |                 |
|                                        | <b><i>Helicops modestus</i></b>           | <b>MG544935</b>                        | <b>MG544952</b>          | <b>MG544969</b> |                 |
|                                        | Dipsadinae                                | <i>Heterodon nasicus</i>               | KX237793                 | KX237850        | KX237893        |
|                                        |                                           | <i>Hypsiglena jani</i>                 | KU323988                 | KU324007        | KU323998        |
|                                        |                                           | <i>Imantodes lentiferus</i>            | KX237807                 | KX237841        | KX237900        |
|                                        |                                           | <i>Leptodeira annulata</i>             | KX237808                 | KX237840        | KX237901        |
|                                        |                                           | <b><i>Oxyrhopus guibei</i></b>         | <b>MG544936</b>          | <b>MG544953</b> | <b>MG544970</b> |
|                                        |                                           | <i>Oxyrhopus melanogenys</i>           | KX237804                 | KX237838        | KX237899        |
|                                        |                                           | <b><i>Philodryas patagoniensis</i></b> | <b>MG544937</b>          | <b>MG544954</b> | <b>MG544971</b> |
|                                        |                                           | <i>Pseudoboa coronata</i>              | KX237803                 | KX237837        | KX237898        |
| <i>Sibon nebulatus</i>                 |                                           | KX237811                               | KX237843                 | KX237902        |                 |
| <b><i>Sibynomorphus mikanii</i></b>    |                                           | <b>MG544938</b>                        | <b>MG544955</b>          | <b>MG544972</b> |                 |
| <b><i>Sibynomorphus neuwiedi</i></b>   |                                           | <b>MG544939</b>                        | <b>MG544956</b>          | <b>MG544973</b> |                 |
| <b><i>Taeniophallus persimilis</i></b> |                                           | <b>MG544941</b>                        | <b>MG544958</b>          | <b>MG544975</b> |                 |
| <b><i>Thamnodynastes hypoconia</i></b> |                                           | <b>MG544942</b>                        | <b>MG544959</b>          | <b>MG544976</b> |                 |
| <b><i>Tomodon dorsatus</i></b>         |                                           | <b>MG544943</b>                        | <b>MG544960</b>          | <b>MG544977</b> |                 |
| <i>Xenopholis scalaris</i>             |                                           | KX237810                               | KX237834                 | KX237897        |                 |
| Xenopeltidae                           |                                           | <i>Xenopeltis unicolor</i>             | FJ497235                 | FJ49723         | FJ497234        |
| Pythonidae                             |                                           | <i>Python regius</i>                   | FJ497238                 | FJ497236        | FJ497237        |

Table S4. Summary of phylogenetic evolutionary branch-site and site models parameters for *LWS*, *RH1* and *SWS1* opsin genes.

| Opsins      | Model               | Ln L      | P                                                                              | Parameter Estimates                                                                                               |
|-------------|---------------------|-----------|--------------------------------------------------------------------------------|-------------------------------------------------------------------------------------------------------------------|
| <b>LWS</b>  | Branch-Site Models  |           |                                                                                |                                                                                                                   |
|             | Null Model          | -11,370.8 | 150                                                                            | $\omega = 1.00$                                                                                                   |
|             | Model A (diurnal)   | -11,347.9 | 152                                                                            | $\omega_0 = 0.05$ ( $p_0 = 0.798$ ), $\omega_1 = 1.0$ ( $p_1 = 0.18$ ); $\omega_2 = 34.3$ ( $p_2 + p_3 = 0.03$ )  |
|             | Model A (nocturnal) | -11,320.3 | 152                                                                            | $\omega_0 = 0.05$ ( $p_0 = 0.77$ ), $\omega_1 = 1.0$ ( $p_1 = 0.17$ ); $\omega_2 = 14.8$ ( $p_2 + p_3 = 0.06$ )   |
|             | Site Models         |           |                                                                                |                                                                                                                   |
|             | Model 0             | -4,598.5  | 101                                                                            | $\omega_0 = 0.49$                                                                                                 |
|             | Model 3             | -4,235.5  | 105                                                                            | $\omega_0 = 0.03$ ( $p_0 = 0.82$ ), $\omega_1 = 1.8$ ( $p_1 = 0.14$ ); $\omega_2 = 6.08$ ( $p_2 = 0.04$ )         |
|             | Model 1a            | -4,316.4  | 102                                                                            | $\omega_0 = 0.014$ ( $p_0 = 0.798$ ), $\omega_1 = 1.0$ ( $p_1 = 0.202$ )                                          |
|             | Model 2a            | -4,238.3  | 104                                                                            | $\omega_0 = 0.017$ ( $p_0 = 0.78$ ), $\omega_1 = 1.0$ ( $p_1 = 0.13$ ); $\omega_2 = 4.19$ ( $p_2 + p_3 = 0.08$ )  |
|             | Model 7             | -4,324.8  | 102                                                                            | $p = 0.0158$ , $q = 0.0987$                                                                                       |
| Model 8     | -4,238.7            | 104       | $p_0 = 0.9095$ , $p = 0.038$ , $q = 0.24$ ( $p_1 = 0.090$ , $\omega = 3.989$ ) |                                                                                                                   |
| <b>RH1</b>  | Branch-Site Models  |           |                                                                                |                                                                                                                   |
|             | Null Model          | -10,943.6 | 146                                                                            | $\omega = 1.00$                                                                                                   |
|             | Model A (diurnal)   | -10,939.4 | 148                                                                            | $\omega_0 = 0.055$ ( $p_0 = 0.86$ ), $\omega_1 = 1.0$ ( $p_1 = 0.14$ ); $\omega_2 = 4.36$ ( $p_2 + p_3 = 0.007$ ) |
|             | Model A (nocturnal) | -10,918.9 | 148                                                                            | $\omega_0 = 0.057$ ( $p_0 = 0.86$ ), $\omega_1 = 1.0$ ( $p_1 = 0.12$ ); $\omega_2 = 11.4$ ( $p_2 + p_3 = 0.02$ )  |
|             | Site Models         |           |                                                                                |                                                                                                                   |
|             | Model 0             | -4,692.8  | 97                                                                             | $\omega_0 = 0.288$                                                                                                |
|             | Model 3             | -4,479.1  | 101                                                                            | $\omega_0 = 0.002$ ( $p_0 = 0.67$ ), $\omega_1 = 0.43$ ( $p_1 = 0.23$ ); $\omega_2 = 2.02$ ( $p_2 = 0.10$ )       |
|             | Model 1a            | -4,497.7  | 98                                                                             | $\omega_0 = 0.022$ ( $p_0 = 0.77$ ), $\omega_1 = 1.0$ ( $p_1 = 0.23$ )                                            |
|             | Model 2a            | -4,483.4  | 100                                                                            | $\omega_0 = 0.024$ ( $p_0 = 0.77$ ), $\omega_1 = 1.0$ ( $p_1 = 0.18$ ); $\omega_2 = 2.7$ ( $p_2 + p_3 = 0.048$ )  |
|             | Model 7             | -4,496.8  | 98                                                                             | $p = 0.018$ , $q = 0.059$                                                                                         |
| Model 8     | -4,479.5            | 100       | $p_0 = 0.926$ , $p = 0.098$ , $q = 0.555$ ( $p_1 = 0.074$ , $\omega = 2.26$ )  |                                                                                                                   |
| <b>SWS1</b> | Branch-Site Models  |           |                                                                                |                                                                                                                   |
|             | Null Model          | -14,248.6 | 154                                                                            | $\omega = 1.00$                                                                                                   |
|             | Model A (diurnal)   | -14,225.3 | 156                                                                            | $\omega_0 = 0.05$ ( $p_0 = 0.84$ ), $\omega_1 = 1.0$ ( $p_1 = 0.077$ ); $\omega_2 = 1.23$ ( $p_2 + p_3 = 0.078$ ) |
|             | Model A (nocturnal) | -14,237.9 | 156                                                                            | $\omega_0 = 0.05$ ( $p_0 = 0.87$ ), $\omega_1 = 1.0$ ( $p_1 = 0.08$ ); $\omega_2 = 1.7$ ( $p_2 + p_3 = 0.046$ )   |
|             | Site Models         |           |                                                                                |                                                                                                                   |
|             | Model 0             | -5,784.0  | 99                                                                             | $\omega_0 = 0.1$                                                                                                  |
|             | Model 3             | -5,565.2  | 103                                                                            | $\omega_0 = 0.00$ ( $p_0 = 0.64$ ), $\omega_1 = 0.17$ ( $p_1 = 0.25$ ); $\omega_2 = 0.73$ ( $p_2 = 0.11$ )        |
|             | Model 1a            | -5,618.6  | 100                                                                            | $\omega_0 = 0.039$ ( $p_0 = 0.86$ ), $\omega_1 = 1.0$ ( $p_1 = 0.14$ )                                            |
|             | Model 2a            | -5,618.6  | 102                                                                            | $\omega_0 = 0.039$ ( $p_0 = 0.86$ ), $\omega_1 = 1.0$ ( $p_1 = 0.1$ ); $\omega_2 = 1.0$ ( $p_2 + p_3 = 0.039$ )   |
|             | Model 7             | -5,568.3  | 100                                                                            | $p = 0.13$ , $q = 0.899$                                                                                          |
| Model 8     | -5,568.3            | 102       | $p_0 = 0.998$ , $p = 0.13$ , $q = 0.92$ ( $p_1 = 0.002$ , $\omega = 1.04$ )    |                                                                                                                   |

$p$ , number of parameters;  $p_0$ ,  $p_1$ ,  $p_2$ , proportion of sites in different omega classes;  $l$ , likelihood.

Table S5. Known amino acid spectral tuning sites of the *LWS* opsin gene and predicted peak absorbance ( $\lambda_{\max}$ ) [1]. Sites numbered based on the bovine rhodopsin sequence. All  $\lambda_{\max}$  values are estimates predicted based on amino acid sequences. Predominant daily activity patterns established based on [2, 3].

| Species                            | 164 | 181 | 261 | 269 | 292 | $\lambda_{\max}$ |
|------------------------------------|-----|-----|-----|-----|-----|------------------|
| <b>Primarily Nocturnal</b>         |     |     |     |     |     |                  |
| <i>Atractus reticulatus</i>        | A   | H   | Y   | A   | A   | ~537             |
| <i>Dipsas petersi</i>              | A   | H   | Y   | A   | A   | ~537             |
| <i>Sibynomorphus mikanii</i>       | A   | H   | Y   | A   | A   | ~537             |
| <i>Sibynomorphus neuwiedi</i>      | A   | H   | Y   | A   | A   | ~537             |
| <i>Oxyrhopus guibei</i>            | A   | H   | Y   | T   | A   | ~553             |
| <b>Primarily Diurnal</b>           |     |     |     |     |     |                  |
| <i>Chironius bicarinatus</i>       | S   | H   | Y   | T   | A   | ~560             |
| <i>Echianthera cephalostriata</i>  | S   | H   | Y   | T   | A   | ~560             |
| <i>Echianthera undulata</i>        | S   | H   | Y   | T   | A   | ~560             |
| <i>Erythrolamprus aesculapii</i>   | S   | H   | Y   | T   | A   | ~560             |
| <i>Erythrolamprus miliaris</i>     | S   | H   | Y   | T   | A   | ~560             |
| <i>Erythrolamprus poecilogyrus</i> | A   | H   | Y   | T   | A   | ~553             |
| <i>Helicops modestus</i>           | S   | H   | Y   | T   | A   | ~560             |
| <i>Philodryas patagoniensis</i>    | S   | H   | Y   | T   | A   | ~560             |
| <i>Spilotes pullatus</i>           | S   | H   | Y   | T   | A   | ~560             |
| <i>Taeniophallus persimilis</i>    | S   | H   | Y   | T   | A   | ~560             |
| <i>Thamnodynastes hypoconia</i>    | A   | H   | F   | T   | A   | ~543             |
| <i>Tomodon dorsatus</i>            | A   | H   | F   | T   | A   | ~545             |

Table S6. Known amino acid spectral tuning sites of the RH1 rhodopsin gene and predicted peak absorbance ( $\lambda_{\max}$ ) [4, 5, 6]. Sites numbered based on the bovine rhodopsin sequence. All  $\lambda_{\max}$  values are estimates predicted based on amino acid sequences. Predominant daily activity patterns established based on [2, 3].

| Species                            | 83 | 96 | 102 | 122 | 183 | 194 | 195 | 253 | 261 | 289 | 292 | 299 | 317 | $\lambda_{\max}$ |
|------------------------------------|----|----|-----|-----|-----|-----|-----|-----|-----|-----|-----|-----|-----|------------------|
| <b>Primarily Nocturnal</b>         |    |    |     |     |     |     |     |     |     |     |     |     |     |                  |
| <i>Atractus reticulatus</i>        | N  | Y  | Y   | E   | M   | P   | T   | M   | F   | T   | A   | A   | M   | ~493             |
| <i>Dipsas petersi</i>              | D  | Y  | Y   | E   | M   | P   | S   | M   | F   | T   | A   | S   | M   | ~500             |
| <i>Sibynomorphus mikanii</i>       | D  | Y  | Y   | E   | M   | P   | S   | M   | F   | T   | A   | S   | M   | ~500             |
| <i>Sibynomorphus neuwiedi</i>      | D  | Y  | Y   | E   | M   | P   | S   | M   | F   | T   | A   | S   | M   | ~500             |
| <i>Oxyrhopus guibeii</i>           | D  | Y  | Y   | E   | M   | P   | S   | M   | F   | T   | A   | S   | M   | ~500             |
| <b>Primarily Diurnal</b>           |    |    |     |     |     |     |     |     |     |     |     |     |     |                  |
| <i>Chironius bicarinatus</i>       | N  | Y  | Y   | E   | M   | P   | T   | M   | F   | T   | S   | A   | M   | ~483             |
| <i>Echinerteron cephalostriata</i> | N  | Y  | Y   | E   | M   | P   | T   | M   | F   | T   | S   | A   | M   | ~483             |
| <i>Echinerteron undulata</i>       | N  | Y  | Y   | E   | M   | P   | T   | M   | F   | T   | S   | A   | M   | ~483             |
| <i>Erythrolamprus aesculapii</i>   | N  | Y  | Y   | E   | M   | P   | T   | M   | F   | T   | S   | A   | M   | ~483             |
| <i>Erythrolamprus miliaris</i>     | N  | Y  | Y   | E   | M   | P   | T   | M   | F   | T   | S   | A   | M   | ~483             |
| <i>Erythrolamprus poecilogyrus</i> | N  | Y  | Y   | E   | M   | P   | T   | M   | F   | T   | S   | A   | M   | ~483             |
| <i>Helicops modestus</i>           | N  | Y  | Y   | E   | M   | P   | T   | M   | F   | T   | S   | A   | M   | ~483             |
| <i>Philodryas patagoniensis</i>    | N  | Y  | Y   | E   | M   | P   | T   | M   | F   | T   | S   | A   | M   | ~483             |
| <i>Spilotes pullatus</i>           | N  | Y  | Y   | E   | M   | P   | T   | M   | F   | T   | S   | A   | M   | ~483             |
| <i>Taeniophallus persimilis</i>    | N  | Y  | Y   | E   | M   | P   | T   | M   | F   | T   | S   | A   | M   | ~483             |
| <i>Thamnodynates hypoconia</i>     | N  | Y  | Y   | E   | M   | P   | T   | M   | F   | T   | S   | A   | M   | ~483             |
| <i>Tomodon dorsatus</i>            | N  | Y  | Y   | E   | M   | P   | T   | M   | F   | T   | S   | A   | M   | ~483             |

Table S7. Known amino acid spectral tuning sites of the SWS1 [7] and predicted peak absorbance ( $\lambda_{\max}$ ). Site numbered based on bovine rhodopsin. Asterisk indicates amino acids with stronger effects on spectral tuning [8, 9, 10]. All  $\lambda_{\max}$  values are estimates predicted based on amino acid sequences (for a review see [11]). Predominant daily activity patterns established based on [2, 3].

| Species                            | 46 | 49 | 52 | 86* | 90 | 93* | 97 | 113* | 114 | 116 | 118 | 265 | $\lambda_{\max}$ |
|------------------------------------|----|----|----|-----|----|-----|----|------|-----|-----|-----|-----|------------------|
| <b>Primarily Nocturnal</b>         |    |    |    |     |    |     |    |      |     |     |     |     |                  |
| <i>Atractus reticulatus</i>        | L  | F  | T  | F   | A  | T   | S  | E    | A   | L   | T   | Y   | UV               |
| <i>Dipsas petersi</i>              | L  | F  | T  | F   | A  | T   | S  | E    | A   | L   | T   | Y   | UV               |
| <i>Sibynomorphus mikanii</i>       | L  | F  | T  | F   | A  | T   | S  | E    | A   | L   | T   | Y   | UV               |
| <i>Sibynomorphus neuwiedi</i>      | L  | F  | T  | F   | A  | T   | S  | E    | A   | L   | T   | Y   | UV               |
| <i>Oxyrhopus guibeii</i>           | L  | F  | T  | F   | A  | V   | S  | E    | A   | L   | T   | Y   | UV               |
| <b>Primarily Diurnal</b>           |    |    |    |     |    |     |    |      |     |     |     |     |                  |
| <i>Chironius bicarinatus</i>       | L  | F  | T  | V   | A  | V   | S  | E    | A   | L   | T   | Y   | ?                |
| <i>Echiantera cephalostriata</i>   | L  | F  | T  | F   | A  | V   | S  | E    | A   | L   | T   | Y   | UV               |
| <i>Echiantera undulata</i>         | L  | F  | T  | F   | A  | V   | S  | E    | A   | L   | T   | Y   | UV               |
| <i>Erythrolamprus aesculapii</i>   | L  | F  | T  | F   | A  | T   | S  | E    | A   | L   | T   | Y   | UV               |
| <i>Erythrolamprus miliaris</i>     | L  | F  | T  | F   | A  | T   | S  | E    | A   | L   | T   | Y   | UV               |
| <i>Erythrolamprus poecilogyrus</i> | L  | F  | T  | F   | A  | T   | S  | E    | A   | L   | T   | Y   | UV               |
| <i>Helicops modestus</i>           | L  | F  | T  | F/V | A  | T/V | S  | E    | A   | L   | T   | Y   | UV/?             |
| <i>Philodryas patagoniensis</i>    | L  | F  | T  | F   | A  | T   | S  | E    | A   | L   | T   | Y   | UV               |
| <i>Spilotes pullatus</i>           | L  | F  | T  | F   | A  | V   | S  | E    | A   | L   | T   | Y   | UV               |
| <i>Taeniophallus persimilis</i>    | L  | F  | T  | F   | A  | V   | S  | E    | A   | L   | T   | Y   | UV               |
| <i>Thamnodynates hypoconia</i>     | L  | F  | T  | F   | A  | T   | S  | E    | A   | L   | T   | Y   | UV               |
| <i>Tomodon dorsatus</i>            | L  | F  | T  | F   | A  | T   | S  | E    | A   | L   | T   | Y   | UV               |



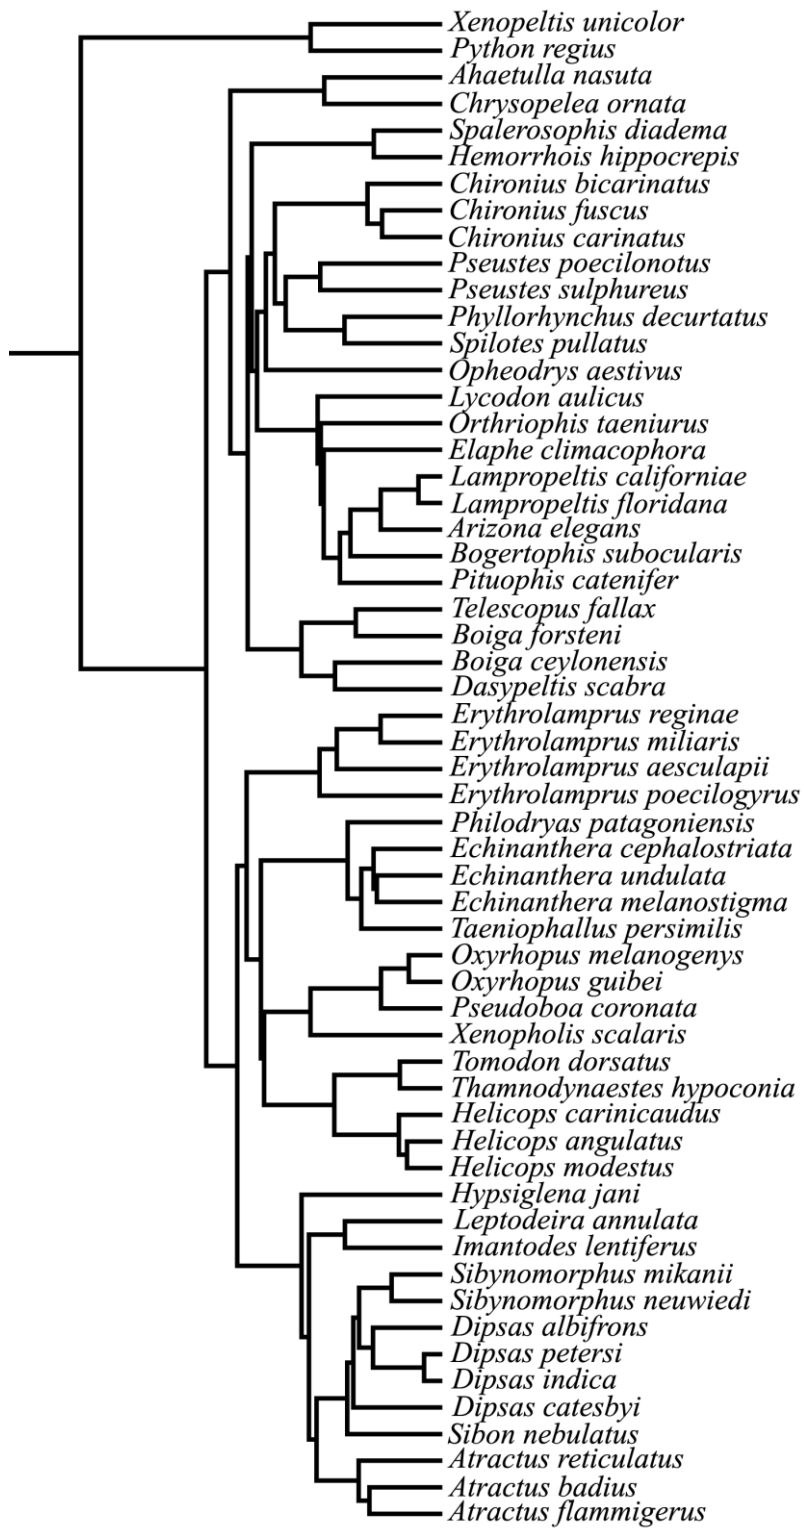

Figure S1. Species phylogenetic tree used for Codeml analysis.

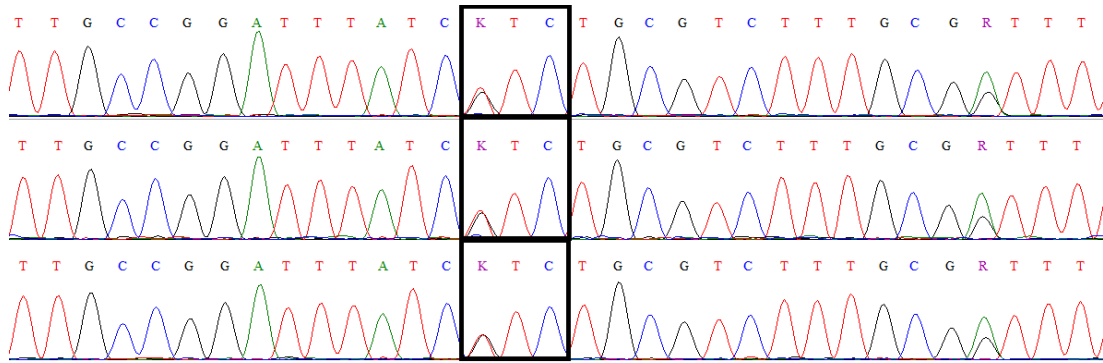

Figure S2. Chromatograms of the same region of the *SWS1* opsin gene of *Helicops modestus*, amplified with different primer pairs. The black boxes indicate the heterozygous site, with codons TTC and GTC, responsible for the transduction of the amino acids phenylalanine and valine at residue 86.

## REFERENCES

1. Yokoyama S, Radlwimmer FB. The molecular genetics of red and green color vision in vertebrates. *Genetics*. 2001;158:1697–1710.
2. Torello-Viera NF, Marques OAV. Daily Activity of Neotropical Dipsadids Snakes. *S Am J Herpetol*. 2017;12(2):128-135.
3. Marques OAV, Eterovic A, Sazima I. *Serpentes da Mata Atlântica: guia ilustrado para a Serra do Mar*. Holos. 2001.
4. Hunt DM, Dulai KS, Partridge JC, Cottrill P, Bowmaker JK. The molecular basis for spectral tuning of rod visual pigments in deep-sea fish. *J Exp Biol*. 2001;204:3333–44.
5. Levenson DH, Ponganis PJ, Crognale MA, Deegan JF, Dizon A, Jacobs GH. Visual pigments of marine carnivores: pinnipeds, polar bear, and sea otter. *J Comp Physiol A*. 2006;192:833–43.
6. Yokoyama S, Tada T, Zhang H, Britt L. Elucidation of phenotypic adaptations: Molecular analyses of dim-light vision proteins in vertebrates. *P Natl Acad Sci USA*. 2008;105:13480–85.
7. Yokoyama S, Starmer WT, Takahashi Y, Tada T. Tertiary structure and spectral tuning of UV and violet pigments in vertebrates. *Gene*. 2006;365:95–103.
8. Babu KR, Dukkipati A, Birge RR, Knox BE. Regulation of phototransduction in short-wavelength cone visual pigments via the retinylidene schiff base counterion. *Biochemistry*. 2001;40:13760–66.
9. Cowing JA, Poopalasundaram S, Wilkie SE, Robinson PR, Bowmaker JK, Hunt DM. The molecular mechanism for the spectral shifts between vertebrate ultraviolet- and violet-sensitive cone visual pigments. *Biochem J*. 2002;367:129–35.
10. Fasick JI, Applebury ML, Oprian DD. Spectral tuning in the mammalian short-wavelength sensitive cone pigments. *Biochemistry*. 2002;41:6860–965.
11. Yokoyama S. Evolution of dim-light and color vision pigments. *Annu Rev Genom Hum Genetics*. 2008;9:259–82.
