# Supplementary material for: Daily activity patterns influence retinal morphology, signatures of selection, and spectral tuning of opsin genes in colubrid snakes
Source: PubMed Central journal article supplement (PMC5725783; doi:10.1186/s12862-017-1110-0), 2017-12-11
Supplement: 12862_2017_1110_MOESM2_ESM.pdf [file 12862_2017_1110_MOESM2_ESM.pdf]

```
121      130      140      150      160      170      180      190      200      210      230      240      250
|      |      |      |      |      |      |      |      |      |      |      |
      Bos_taurus_Rh1 CCTTTCTCCAACAAGACGGGGGTGGTGCAGCCCTTCGAGGCCCGCAGTACTACCTGGCGGAGCCATGGCAGTTCCTCCATGCTGGCCGCTACATGTTCTCTGCTGATCATGCTTGGC
      Atractus_reticulatus_Rh1 CCTATGTCAAACAAGACTGGCATTGTTCGGAGTCCATATGAATATCCCCAATATTTATTTGGCAGATCCATGGAAATATTTCTGCCTTGGCTGCATACATGTTTCTTCTGATCTGCCTTGGGA
      Chironius_bicarinatus_Rh1 -----TGTTCCGGAGTCCATTTGAGTATCCTCAATATTTATTTGGCAGATCCATGGAAATATTTCTGCCTTGGCTGCGTACATGTTTCTTCTGATCTGCCTTGGT
      Dipsas_petersi_Rh1 -----ACAAGACTGGCGTTGTTCGGAGTCCATATGAGTATCCCCAATATTTATTTGGCAGATCCATGGAAATATTTCTGCCTTGGCTGCATACATGTTTCTTCTGATCTGCCTTGGGA
      Echinantera_cephalostriata_Rh1 -----AACAAGACTGGCATTGTTCGGAGTCCATATGAGTATCCCCAATATTTATTTGGCAGATCCCTTGGAAATATTTCTGCCTTGGCTGCATACATGTTTCTTCTGATCTGCCTTGGGA
      Echinantera_undulata_Rh1 -----TCCATTTGAGTATCCCCAATATTTATTTGGCAGATCCCTTGGAAATATTTCTGCCTTGGCTGCATACATGTTTCTTCTGATCTGCCTTGGGA
      Erythrolamprus_aesculapii_Rh1 CCTATGTCAAACAAGACTGGCATTGTTCGGAGTCCATATGAGTATCCCCAATATTTATTTGGCAGATCCATGGAAATATTTCTGCCTTGGCTGCATACATGTTTCTTCTGATCTGCCTTGGGA
      Erythrolamprus_miliaris_Rh1 CCTATGTCAAACAAGACTGGCATTGTTCGGAGTCCATATGAGTATCCCCAATATTTATTTGGCAGATCCATGGAAATATTTCTGCCTTGGCTGCATACATGTTTCTTCTGATCTGCCTTGGGA
      Erythrolamprus_poecilogyrus_Rh1 -----
      Helicops_modestus_Rh1 -----AACAAGACTGGCGTTGTTCGGAGTCCATATGAGTATCCCCAATATTTATTTAGCAGATCCATGGAAATATTTCTGCCTTGGCTGCATACATGTTTCTTCTGATCTGCCTTGGGA
      Oxyrhopus_guibeii_Rh1 -----TGTTCCGGAGTCCATTTGAGTATCCCCAATATTTATTTGGCAGATCCATGGAAATATTTCTGCCTTGGCTGCATACATGTTTTTCTGATCTGCCTTGGGA
      Philodryas_patagoniensis_Rh1 -----TGTTTCTTCTGATCTGCCTTGGGA
      Python_regius_Rh1 CCTATGTCAAACAAGACTGGTATTGTTCGGAGTCCATTTGAGTATCCCCAATATTTATTTGGCAGAACCATGGAAATATTTCTGCCTTGGCTGCATACATGTTTCTTCTGATCTGCCTTGGGA
      Sibynomorphus_mikanii_Rh1 -----ACCATGGAAATATTTCTGCCTTGGCTGCATACATGTTTCTTCTGATCTGCCTTGGGA
      Sibynomorphus_neuwiedii_Rh1 -----CCATGGAAATATTTCTGCCTTGGCTGCATACATGTTTCTTCTGATCTGCCTTGGGA
      Spilotes_pullatus_Rh1 -----ATTTGAGTATTATTTATTTGGCAGATCCATGGAAATATTTCTGCCTTGGCTGCGTACATGTTTCTTCTGATCTGCCTTGGT
      Taeniophallus_persimilis_Rh1 -----AACAAGACTGGCATTGTTCGGAGTCCATATGAGTATCCCCAATATTTATTTGGCAGATCCCTTGGAAATATTTCTGCCTTGGCTGCATACATGTTTCTTCTGATCTGCCTTGGGA
      Thamnodynastes_strigatus_Rh1 -----ATCCCCAATATTTATTTGGCAGATCCATGGAAATATTTCTGCCTTGGCTGCATACATGTTTCTTCTGATCTGCCTTGGGA
      Tomodon_dorsatus_Rh1 -----TTGTTCGGAGTCCATTTGAGTATCCCCAATATTTATTTGGCAGATCCATGGAAATATTTCTGCCTTGGCTGCATACATGTTTCTTCTGATCTGCCTTGGGA
      Xenopeltis_unicolor_Rh1 CCTATGTCAAACAAGACTGGCATTGTTCGGAGTCCATTTGAGTATCCCCAATATTTATTTGGCAGATCCATGGAAATATTTCTGCCTTGGCTGCATACATGTTTCTTCTGATCTGCCTTGGGA
      Atractus_reticulatus_LWS TTTGTGTACACCAACAGCAACAATACCCGTGGCCCTTTTGAAGGTCCAAACTATCATATTCACCACGATGGGTCTACAACCTAACTTCACTCTGGATGGTCTTTTGTGTGTGGCTCA
      Chironius_bicarinatus_LWS TTTGTGTATACCAACAGCAACAATACCCGTGACCCCTTTTGAAGGTCCAAACTATCATATTCACCACGATGGGTCTACAACATAAECTTCACTCTGGATGGTCTTTTGTGTGTGGCTCA
      Dipsas_petersi_LWS TTTGTGTACACCAACAGCAACAATACCCGTGGCCCTTTTGAAGGTCCAAACTATCATATTCACCACGATGGGTCTACAACCTAACTTCACTCTGGATGGTCTTTTGTGTGTGGCTCA
      Echinantera_cephalostriata_LWS TTTTCTTACACCAACAGCAACAATACCCGTGACCCCTTTTGAAGGTCCAAACTATCATATTCACCACGATGGGTCTACAACATAAECTTCACTCTGGATGGTCTTTTGTGTGTGGCTCA
      Echinantera_undulata_LWS TTTTCTTACACCAACAGCAACAATACCCGTGACCCCTTTTGAAGGTCCAAACTATCATATTCACCACGATGGGTCTACAACATAAECTTCACTCTGGATGGTCTTTTGTGTGTGGCTCA
      Erythrolamprus_aesculapii_LWS -----TATACCAATAGCAACAATACCCGTGACCCCTTTTGAAGGTCCAAACTATCATATTCACCACGATGGGTCTACAACATAAECTTCACTCTGGATGGTCTTTTGTGTGTGGCTCA
      Erythrolamprus_miliaris_LWS TTTGCTTACACCAATAGCAACAATACCCGTGACCCCTTTTGAAGGTCCAAACTATCATATTCACCACGATGGGTCTACAACATAAECTTCACTCTGGATGGTCTTTTGTGTGTGGCTCA
      Erythrolamprus_poecilogyrus_LWS TTTGCTTACACCAATAGCAACAATACCCGTGACCCCTTTTGAAGGTCCAAACTATCATATTCACCACGATGGGTCTACAACATAAECTTCACTCTGGATGGTCTTTTGTGTGTGGCTCA
      Helicops_modestus_LWS TTTGCTTACACCAACAGCAACAATACCCGTGACCCCTTTTGAAGGTCCAAACTATCATATTCACCACGATGGGTCTACAACCTAACTTCACTCTGGATGGTCTTTTGTGTGTGGCTCA
      Oxyrhopus_guibeii_LWS TTTGTTTACACCAACAGCAACAATACCCGTGACCCCTTTTGAAGGTCCAAACTATCATATTCACCACGATGGGTCTACAACCTAACTTCACTCTGGATGGTCTTCGTTGTGTGGCTCA
      Philodryas_patagoniensis_LWS TTTGCTTACACCAACAGCAACAATACCCGTGACCCCTTTTGAAGGTCCAAACTATCATATTCACCACGATGGGTCTACAACATAAECTTCACTCTGGATGGTCTTTTGTGTGTGGCTCA
      Python_regius_LWS TTTATTTACACCAACAGCAACAATACCCGTGACCCCTTTTGAAGGTCCAAACTATCATATTCACCACGATGGGTCTACAACCTAACTTCACTCTGGATGGTCTTTTGTGGTCATGGCTCA
      Sibynomorphus_mikanii_LWS TTTGTGTACACCAACAGCAACAATACCCGTGGCCCTTTTGAAGGTCCAAACTATCATATTCACCACGATGGGTCTACAACCTAACTTCACTCTGGATGGTCTTTTGTGTGTGGCTCA
      Sibynomorphus_neuwiedii_LWS TTTGTGTACACCAACAGCAACAATACCCGTGACCCCTTTTGAAGGTCCAAACTATCATATTCACCACGATGGGTCTACAACCTAACTTCACTCTGGATGGTCTTTTGTGTGTGGCTCA
      Spilotes_pullatus_LWS TTTGCTTATACCAACAGCAACAATACCCGTGACCCCTTTTGAAGGTCCAAACTATCATATTCACCACGATGGGTCTACAACATAAECTTCACTCTGGATGGTCTTTTGTGTGTGGCTCA
      Taeniophallus_persimilis_LWS TTTTCTTACACCAACAGCAACAATACCCGTGACCCCTTTTGAAGGTCCAAACTATCATATTCACCACGATGGGTCTACAACATAAECTTCACTCTGGATGGTCTTTTGTGTGTGGCTCA
      Thamnodynastes_strigatus_LWS TTTACTTACACCAACAGCAACAATACCCGTGACCCCTTTTGAAGGTCCAAACTATCATATTCACCACGATGGGTCTACAACCTAACTTCACTCTGGATGGTCTTTTGTGTGTGGCTCA
      Tomodon_dorsatus_LWS TTTGTTTACACCAACAGCAACAATACCCGTGACCCCTTTTGAAGGTCCAAACTATCATATTCACCACGATGGGTCTACAACCTAACTTCACTCTGGATGGTCTTTTGTGTGTGGCTCA
      Xenopeltis_unicolor_LWS TTTGTTTACACCAACAGCAACAATACCCGTGACCCCTTTTGAAGGTCCAAACTATCATATTCACCACGATGGGTCTACAACCTAACTTCACTCTGGATGGTCTTTTGTGTGTGGCTCA
      Atractus_reticulatus_SWS1 -----TTCCACTTCCAACCATCTTCATGGGCTGGTCTTTTGTGGCCGGG
      Chironius_bicarinatus_SWS1 -----TTCTTTGGCCGGG
      Dipsas_petersi_SWS1 -----GACGGTCCCCAGTATCACATTTGCGCCCATGTGGGCTTCCACTTCCAAGCCATCTTCATGGGCTGGTCTTCTTTGGCCGGG
      Echinantera_cephalostriata_SWS1 -----CCAATTTCAAACCATCTTCATGGGCTGGTCTTCTTTGGCCGGG
      Echinantera_undulata_SWS1 -----GGGTCTTCCACTTCCAACCATCTTCATGGGCTGGTCTTCTTTGGCCGGG
      Erythrolamprus_aesculapii_SWS1 -----GACGGTCCCCAGTATCACATTTGCGCCCAAGTGGGCTTCCACTTCCAACCATCTTCATGGGCTGGTCTTCTTTGGCCGGG
      Erythrolamprus_miliaris_SWS1 -----GACGGTCCCCAGTATCACATTTGCGCCCATGTGGGCTTCCACTTCCAACCATCTTCATGGGCTGGTCTTCTTTGGCCGGG
      Erythrolamprus_poecilogyrus_SWS1 -----CCTTCCACTTCCAACCATCTTCATGGGCTGGTCTTCTTTGGCCGGG
      Helicops_modestus_SWS1 -----GGTCCCCAATATCACATCGCACCCATGTGGGCTTCCACTTCCAACCATCTTCATGGGCTGGTCTTATTTGGCCGGG
      Oxyrhopus_guibeii_SWS1 -----CTTCCACTTCCAACCATCTTCATGGGCTGGTCTTCTTTGGCCGGG
      Philodryas_patagoniensis_SWS1 -----
      Python_regius_SWS1 ---TACCTCTTTGAAAACATCTCCTCCGTGGGGCCCTGGGACGGTCCCCAGTATCACATTTGCCCCATGTGGGCTTCCACTTCCAAGCCCTCTTCATGGGCTTGGTCTTCTTTGGCTGGG
      Sibynomorphus_mikanii_SWS1 -----GGGACGGTCCCCAGTATCACATTTGCGCCCATGTGGGCTTCCACTTCCAGGCCATCTTCATGGGCTGGTCTTCTTTGGCCGGG
      Sibynomorphus_neuwiedii_SWS1 -----GACGGTCCCCAGTATCACATTTGCGCCCATGTGGGCTTCCACTTCCAAGCCATCTTCATGGGCTGGTCTTCTTTGGCCGGG
      Spilotes_pullatus_SWS1 -----CTTCCACTTCCAACCATCTTCATGGGCTGGTCTTCTTTGGCCGGG
      Taeniophallus_persimilis_SWS1 -----TTCCAACCATCTTCATGGGCTGGTCTTCTTTGGCCGGG
      Thamnodynastes_strigatus_SWS1 -----CCTCCACTTCCAACCATCTTCATGGGCTGGTCTTCTTTGGCCGGG
      Tomodon_dorsatus_SWS1 -----CGTGAGGCCCTGGGATGGCCCTCAATATCACATCGCGCCCATGTGGGCTTCCACTTCCAACCATCTTCATGGGCTGGTCTTCTTTGGCCGGG
      Xenopeltis_unicolor_SWS1 TTCTACCTCTTTGAAAACATCTCCTCCGTGGGGCCCTGGGACGGTCCCCAGTATCACATTTGCCCCATGTGGGCTTCCGCTTCCAACCAGCCCTTCATGGGCTTGGTGTCTTTGGCCGGG
```





```
491      500      510      520      530      540      550      560      570      580      590      600      610
|        |        |        |        |        |        |        |        |        |        |        |
      Bos_taurus_Rh1  CCTGGCCATCGAGCGGTACGTGGTGGTGTGCAAGCCCATGAGCAACTTCGGCTTCGGGGAGAACCACGCCATCATGGGCGTGCCTTCACCTGGGTCATGGCTCTGGCCTGTGCCGCGCC
      Atractus_reticulatus_Rh1  CCTGGCTGTAGAAAGATATGTAGTAGTGTGTAAGCCCATGAGCAACTTCGGTTTACCAGAACTCAGCCATCATGGGAGTGGCCTTCACTTGGATCATGGCATTGGCTTGTGCTGCTCC
      Chironius_bicarınatus_Rh1  CCTGGCTGTAGAAAGATATGTAGTAGTGTGTAAGCCCATGAGTAAGTTCGGTTTACCAGAACTCAGCCATCATGGGACTGTCTCTCACTTGGATCATGGCCTTGGCTTGTGCTGCTCC
      Dipsas_petersi_Rh1  CCTGGCTATAGAAAGATATGTAGTAGTGTGTAAGCCCATGAGCAACTTCGGTTTACCAGAACTCAGCCATCATGGGAGTGGCCTTCACTTGGATCATGGCATTGGCTTGTGCTGCTCC
      Echinantera_cephalostriata_Rh1  CCTGGCTGTAGAAAGATATGTAGTAGTGTGTAAGCCCATGAGCAACTTCGGTTTACCAGAACTCAGCCATCATGGGAGTGGCCTTCACTTGGATCATGGCATTGGCTTGTGCTGCTCC
      Echinantera_undulata_Rh1  CCTGGCTGTAGAAAGATATGTAGTAGTGTGTAAGCCCATGAGCAACTTCGGTTTACCAGAACTCAGCCATCATGGGAGTGGCCTTCACTTGGATCATGGCATTGGCTTGTGCTGCTCC
      Erythrolamprus_aesculapii_Rh1  CCTGGCTGTAGAAAGATATGTAGTAGTGTGTAAGCCCATGAGCAACTTCGGTTTACCAGAACTCAGCCATCGCGGGAGTGTGCTTAACTTGGATCATGGCATTGGCTTGTGCTGTTCC
      Erythrolamprus_miliaris_Rh1  CCTGGCTGTAGAAAGATATGTAGTAGTGTGTAAGCCCATGAGCAACTTCGGTTTACCAGAACTCAGCCATCGCGGGAGTGTGCTTAACTTGGATCATGGCATTGGCTTGTGCTGTTCC
      Erythrolamprus_poecilogyrus_Rh1  CCTGGCTGTAGAAAGATATGTAGTAGTGTGTAAGCCCATGAGCAACTTCGGTTTACCAGAACTCAGCCATCGCGGGAGTGTGCTTAACTTGGATCATGGCATTGGCTTGTGCTGCTCC
      Helicops_modestus_Rh1  CCTGGCTGTAGAAAGATATGTAGTAGTGTGTAAGCCCATGAGCAACTTCGGTTTACCAGAACTCAGCCATCATGGGAGTGGCCTTCACTTGGATCATGGCATTGGCTTGTGCTGCTCC
      Oxyrhopus_guibeı_Rh1  CCTGGCTATAGAAAGATATGTAGTAGTGTGTAAGCCCATGAGCAACTTCGGTTTCACTGAAACTCAGCCATCGTGGGGTATCCCTTCACTTGGATCATGGCTATGGCTTGTGCTGCTCC
      Philodryas_patagoniensis_Rh1  CCTGGCTGTAGAAAGATATGTAGTAGTGTGTAAGCCCATGAGCAACTTCGGTTTACCAGAACTCAGCCATCATGGGAGTGGCCTTCACTTGGATCATGGCATTGGCTTGTGCTGCTCC
      Python_regius_Rh1  CCTGGCTATAGAAAGATATGTAGTGGTGTGTAAGCCCATGAGCAACTTCGGTTTCACTGAGACTCATGCCATCATGGGAGTGTGTTTACATGGATCATGGCCTTGGCTTGTGCCGGTCC
      Sibynomorphus_mikanii_Rh1  CCTGGCTATAGAAAGATATGTAGTAGTGTGTAAGCCCATGAGCAACTTCGGTTTACCAGAACTCAGCCATCATGGGAGTGGCCTTCACTTGGATCATGGCATTGGCTTGTGCTGCTCC
      Sibynomorphus_neuwiedii_Rh1  CCTGGCTATAGAAAGATATGTAGTAGTGTGTAAGCCCATGAGCAACTTCGGTTTACCAGAACTCAGCCATCATGGGAGTGGCCTTCACTTGGATCATGGCATTGGCTTGTGCTGCTCC
      Spilotes_pullatus_Rh1  CCTGGCTGTAGAAAGATATGTAGTAGTGTGTAAGCCCATGAGTAAGTTCGGTTTACCAGAACTCAGCCATCATGGGAGTGGCCTTCACTTGGATCATGGCCTTGGCTTGTGCTGCGCC
      Taeniophallus_persimilis_Rh1  CCTGGCTGTAGAAAGATATGTAGTAGTGTGTAAGCCCATGAGCAACTTCGGTTTACCAGAACTCAGCCATCATGGGAGTGGCCTTCACTTGGATCATGGCATTGGCTTGTGCTGCTCC
      Thamnodynastes_strigatus_Rh1  CCTGGCTGTAGAAAGATATGTAGTAGTGTGTAAGCCCATGAGCAACTTCGGTTTACCAGAACTCAGCCATCATGGGAGTGGCCTTCACTTGGATCATGGCATTGGCTTGTGCTGCTCC
      Tomodon_dorsatus_Rh1  CCTGGCTATAGAAAGATATGTAGTGGTGTGTAAGCCCATGAGTAAGTTCGGTTTCACTGAAACTCATGCCATCATGGGACTGGCTTCACTTGGATCATGGCCTTGTCTTGTGCTGGTCC
      Xenopeltis_unicolor_Rh1  TATTTCCCTGGGAGCGCTGGTGTGTTGTGTTGCAAAACCTTTGGAAATATCAAGTTTGATGCTAAAAATGGCTGTTGGTGGTATTTTGTCTCCTGGATATGGGCTTCCCTGGACAGCACC
      Atractus_reticulatus_LWS  TATTTCCCTGGGAGCGCTGGTGTGTTGTGTTGCAAAACCTTTGGAAATATCAAGTTTGATGCTAAAAATGGCTGTTGGTGGTATTTTGTCTCCTGGATATGGGCTTCCCTGGACAGCACC
      Chironius_bicarınatus_LWS  TATTTCCCTGGGAGCGCTGGTGTGTTGTGTTGCAAAACCTTTGGAAATATCAAGTTTGATGCTAAAAATGGCTGTTGGTGGTATTTTGTCTCCTGGATATGGTCTTGGCCTGGACAGCACC
      Dipsas_petersi_LWS  TATTTCCCTGGGAGCGCTGGTGTGTTGTGTTGCAAAACCTTTGGAAATATCAAGTTTGACGCTAAAAATGGCTGTTGGTGGTATTTTGTCTCCTGGATATGGGCTTCCCTGGACAGCACC
      Echinantera_cephalostriata_LWS  TATTTCCCTGGGAGCGCTGGTGTGTTGTGTTGCAAAACCTTTGGAAATATCAAGTTTGATGCTAAAAATGGCTATGGGTTGGTATTTTGTCTCCTGGATATGGTCTTGGCCTGGACAGCACC
      Echinantera_undulata_LWS  TATTTCCCTGGGAGCGCTGGTGTGTTGTGTTGCAAAACCTTTGGAAATATCAAGTTTGATGCTAAAAATGGCTATGGGTTGGTATTTTGTCTCCTGGATATGGTCTTGGCCTGGACAGCACC
      Erythrolamprus_aesculapii_LWS  TATTTCCCTGGGAGCGCTGGTGTGTTGTGTTGCAAAACCTTTGGAAATATCAAGTTTGATGCTAAAAATGGCTATGGGTTGGTATTTTGTCTCCTGGATATGGTCTTGGCCTGGACAGCACC
      Erythrolamprus_miliaris_LWS  TATTTCCCTGGGAGCGCTGGTGTGTTGTGTTGCAAAACCTTTGGAAATATCAAGTTTGATGCTAAAAATGGCTATGGGTTGGTATTTTGTCTCCTGGATATGGTCTTGGCCTGGACAGCACC
      Erythrolamprus_poecilogyrus_LWS  TATTTCCCTGGGAGCGCTGGTGTGTTGTGTTGCAAAACCTTTGGAAATATCAAGTTTGATGCTAAAAATGGCTGTTGGAGGTATTTTGTCTCCTGGATATGGGCTTGTCTCCTGGACAGCACC
      Helicops_modestus_LWS  TATTTCCCTGGGAGCGCTGGTGTGTTGTGTTGCAAAACCTTTGGCAATATCAAGTTTGATGCTAAAAATGGCTATGGTGGTATTTTGTCTCCTGGATATGGTCTTGTGCTGGACAGCACC
      Oxyrhopus_guibeı_LWS  TATTTCCCTGGGAGCGCTGGTGTGTTGTGTTGCAAAACCTTTGGAAATATCAAGTTTGATGCTAAAAATGGCTATGGTGGTATTTTGTCTCCTGGATATGGGCTTCCACCTGGACAGCACC
      Philodryas_patagoniensis_LWS  TATTTCCCTGGGAGCGCTGGTGTGTTGTGTTGCAAAACCTTTGGAAATATCAAGTTTGATGCTAAAAATGGCTATGGTGGTATTTTCTCTCCTGGATATGGTCTGCCATCTGGACAGCACC
      Python_regius_LWS  TATTTCCCTGGGAGCGCTGGTGTGTTGTGTTGCAAAACCTTTGGAAATATCAAGTTTGATGCTAAAAATGGCCCTTGTGTCGCTTGTGTCGCTGGATATGGTCTTGGACAGCACC
      Sibynomorphus_mikanii_LWS  TATTTCCCTGGGAGCGCTGGTGTGTTGTGTTGCAAAACCTTTGGAAATATCAAGTTTGACGCTAAAAATGGCTGTTGGTGGTATTTTGTCTCCTGGATATGGGCTTCCCTTGGACAGCACC
      Sibynomorphus_neuwiedii_LWS  TATTTCCCTGGGAGCGCTGGTGTGTTGTGTTGCAAAACCTTTGGAAATATCAAGTTTGATGCTAAAAATGGCTATGGTGGTATTTTGTCTCCTGGATATGGGCTTCCCTTGGACAGCGCC
      Spilotes_pullatus_LWS  TATTTCCCTGGGAGCGCTGGTGTGTTGTGTTGCAAAACCTTTGGAAATATCAAGTTTGATGCTAAAAATGGCTATGGTGGTATTTTCTCTCCTGGATATGGTCTTGGCTTGGACAGCACC
      Taeniophallus_persimilis_LWS  TATTTCCCTGGGAGCGCTGGTGTGTTGTGTTGCAAAACCTTTGGAAATATCAAGTTTGATGCTAAAAATGGCTATGGTGGTATTTTGTCTCCTGGATATGGTCTTGGCCTGGACAGCACC
      Thamnodynastes_strigatus_LWS  TATTTCCCTGGGAGCGCTGGTGTGTTGTGTTGCAAAACCTTTGGAAATATCAAGTTTGATGCTAAAAATGGCTATGGTGGTATTTTGTCTCCTGGATATGGGCTGGCGCTGGACAGCACC
      Tomodon_dorsatus_LWS  AATTTCCCTGGGAGCGCTGGTGTGTTGTGTTGCAAAACCTTTGGAAATATCAAGTTTGATGCTAAAAATGGCCCTTGTGTCGCTTGTGTCGCTGGATATGGGCTGGCGCTGGACAGCACC
      Xenopeltis_unicolor_LWS  CCTCGCCTTTGAGCGCTACATCGTGATCTGCAAGCCGCTGGGGAACCTCCGTTTCCATGCCAAACACGCGGTGGTAGTGGTGGCGACCACGTGGGTCAATTGGAGTGGGGGTGGCGATCCC
      Atractus_reticulatus_SWS1  CCTCGCCTTTGAAACGCTACATCGTGATCTGCAAGCCGCTAGGGAACCTCCGTTTCAACTCCAAACACGCTGCTGGTAGTGGTGGCGACCACGTGGATCATGGAAATCGCGGTCTCCGTTCC
      Chironius_bicarınatus_SWS1  CCTCGCCTTCCGAGCGCTACATCGTGATCTGCAAGCCGCTGGGGAACCTCCGTTTCAACGCCAAACACGCGGTGGTAGTGGTGGCGACCACATGGGTCACTGGAGTGGGGGTAGCTATCCC
      Dipsas_petersi_SWS1  CCTYGCCTTTGAACGCTACATCGTGATCTGCAAGCCGATGGGGAACCTCCGTTTCAACGCCAAACATGCTCTGGTAGTGGTGGCGACCACGTGGGTCAATTGGAGTGGGGGTGGCTGTCCC
      Echinantera_cephalostriata_SWS1  CCTCGCCTTTGAACGCTACATCGTGATCTGCAAGCCGATGGGGAACCTCCGTTTCAACGCCAAACATGCTCTGGTAGTGGTGGCGACCACGTGGGTCAATTGGAGTGGGGGTGGCTGTCCC
      Echinantera_undulata_SWS1  CCTCGCCTTTGAACGCTACATCGTGATCTGCAAGCCGATGGGGAACCTCCGTTTCAACGCCAAACATGCTCTGGTAGTGGTGGCGACCACGTGGGTCAATTGGAGTGGGGGTGGCTGTCCC
      Erythrolamprus_aesculapii_SWS1  CCTCGCCTTTGAAACGCTACATCGTGATCTGCAAGCCGCTGGGGAACCTCCGTTTCAACTGCCAAACATGCTCTGGTAGTGGTGGCGACCACGTGGGTCAATTGGAGTGGGGGTGGCTATCCC
      Erythrolamprus_miliaris_SWS1  CCTCGCCTTTGAAACGCTACATCGTGATCTGCAAGCCGCTGGGGAACCTCCGTTTCAACGCCAAACACGCGGTGGTAGTGGTGGCAACCACGTGGGTCAATTGGAGTGGGGGTGGCTATCCC
      Erythrolamprus_poecilogyrus_SWS1  CCTCGCCTTTGAAACGCTACATCGTGATCTGCAAGCCGCTGGGGAACCTCCGTTTCAACGCCAAACATGCTCTGGTAGTGGTGGCGACCACGTGGGTCAATTGGAGTGGGGGTGGCTATCCC
      Helicops_modestus_SWS1  CCTYGCCTTTGAACGCTACATCGTGATCTGCAAGCCGCTGGGGAACCTCCGTTTCAACGCCAAACACGCGGTGGTAGTGGTGGCAACCACATGGGTCACTGGAGTGGGGGTGGCTATCCC
      Oxyrhopus_guibeı_SWS1  CCTCGCCTTTGAACGCTACATCGTGATCTGCAAGCCGCTGGGGAACCTCCGTTTCAACGCCAAACATGCTCTGGTAGTGGTGGCAACCACGTGGGTCAATTGGAGTGGGGGTGGCTATCCC
      Philodryas_patagoniensis_SWS1  CCTTGCCTTTGAACGCTACATCGTGATCTGCAAGCCGCTGGGGAACCTCCGTTTCAAYGCCAAACATGCTCTGGTAGTGGTGGCGACCACGTGGGTCAATTGGAGTGGGGGTGGCTATCCC
      Python_regius_SWS1  CCTTGCCTTTGAAACGCTACATCGTGATCTGCAAGCCGCTGGGGAACCTCCGCTTCAACTCCAAGCATGCTCTGCTGGTGGTGGTGGCCACGTGGGTCACTGGGGTGGGGTGTCCGTCCC
      Sibynomorphus_mikanii_SWS1  CCTCGCCTTTGAGCGCTACATCGTGATCTGCAAGCCGCTGGGGAACCTCCGTTTCAACGCCAAACACGCGGTGGTAGTGGTGGCGACCACATGGGTCACTGGAGTGGGGGTAGCTATCCC
      Sibynomorphus_neuwiedii_SWS1  CCTCGCCTTTGAGCGCTACATCGTGATCTGCAAGCCGCTGGGGAACCTCCGTTTCAACGCCAAACACGCGGTGGTAGTGGTGGCAACCACATGGGTCACTGGAGTGGGGGTAGCTATCCC
      Spilotes_pullatus_SWS1  CCTCGCCTTTGAAACGCTACATCGTGATCTGCAAGCCGCTGGGGAACCTCCGTTTCAACTGCCAAACATGCTCTGGTAGTGGTGGCGACCACGTGGATCATGGAAATGGGGTCTCCGTTCC
      Taeniophallus_persimilis_SWS1  CCTCGCCTTTGAAACGCTACATCGTGATCTGCAAGCCGATGGGGAACCTCCGTTTCAACGCCAAACATGCTCTGGTAGTGGTGGCGACCACGTGGGTCAATTGGAGTGGGGGTGGCTATCCC
      Thamnodynastes_strigatus_SWS1  CCTCGCCTTTGAAACGCTACATCGTGATCTGCAAGCCGATGGGGAACCTCCGCTTCAACGCCAAACATGCTCTGGTAGTGGTGGCGACCACGTGGGTCAATTGGAGTGGGGGTGGCTATCCC
      Tomodon_dorsatus_SWS1  CCTCGCCTTTGAAACGCTACATCGTGATCTGCAAGCCGATGGGGAACCTCCGCTTCAACGCCAAACATGCTCTGGTAGTGGTGGCGACCACGTGGATCAATTGGAGTGGGGGTGGCTATCCC
      Xenopeltis_unicolor_SWS1  CCTCGCCTTTGAAACGATATGGTTCATCTGCAAAACCTTGGAAATTTCCGCTTCAACGCCAAACACGCGCTGCTGGTGGTGGCGGCCACGTGGGTCACTGGGGTGGGGTGTCCATCCC
```

|                                  | 611       | 620      | 630     | 640      | 650      | 660     | 670    | 680    | 690    | 700     | 710     | 720      | 730    |
|----------------------------------|-----------|----------|---------|----------|----------|---------|--------|--------|--------|---------|---------|----------|--------|
| Bos taurus_Rh1                   | CCCCCTCGT | CGTTCGGT | TCCAGG  | TACATCCC | GGAGGG   | GCATGC  | AGTGC  | TCTGCG | GGGATT | GACTACT | ACACG   | -----    | CCCCAC |
| Atractus reticulatus_Rh1         | TCCTCTGG  | TTGGAT   | GGTCAAG | GATATAT  | CCCAGA   | AGGTAT  | GCAGAG | CTCATG | TGGAAT | GATTATT | TATACG  | -----    | CCTATA |
| Chironius bicarinatus_Rh1        | TCCTCTGA  | TGGAT    | GGTCAAG | GATATAT  | CCCAGA   | AGGTAT  | GCAGAG | CTCATG | TGGAGT | TGATTAT | TATACG  | -----    | CCTATA |
| Dipsas petersi_Rh1               | TCCTCTGG  | TTGGAT   | GGTCAAG | GATATAT  | CCCAGA   | AGGTAT  | GCAGAG | CTCATG | TGGAAT | GATTATT | TATACG  | -----    | CCTATA |
| Echinantera cephalostriata_Rh1   | TCCTCTRG  | TTGGAT   | GGTCAAG | GATATAT  | CCCAGA   | AGGTAT  | GCAGAG | CTCATG | TGGAGT | TGATTAT | TATACA  | -----    | CCTATA |
| Echinantera undulata_Rh1         | TCCTCTGG  | TTGGAT   | GGTCAAG | GATATAT  | CCCAGA   | AGGTAT  | GCAGAG | CTCATG | TGGAGT | TGATTAT | TATACA  | -----    | CCTATA |
| Erythrolamprus aesculapii_Rh1    | TCCTCTGA  | TGGAT    | GGTCAAG | GATATAT  | CCCAGA   | AGGTAT  | GCAGAG | CTCATG | TGGAGT | TGATTAT | TATACA  | -----    | CCTATA |
| Erythrolamprus miliaris_Rh1      | TCCTCTGA  | TTGGAT   | GGTCAAG | GATATAT  | CCCAGA   | AGGTAT  | GCAGAG | CTCATG | TGGAGT | TGATTAT | TATACA  | -----    | CCTATA |
| Erythrolamprus poecilogyrus_Rh1  | TCCTCTGA  | TTGGAT   | GGTCAAG | GATATAT  | CCCAGA   | AGGTAT  | GCAGAG | CTCATG | TGGAGT | TGATTAT | TATACA  | -----    | CCTATA |
| Helicops modestus_Rh1            | TCCTTTGG  | TTGGAT   | GGTCAAG | GATATAT  | CCCAGA   | AGGTAT  | GCAGAG | CTCATG | TGGAGT | TGATTAT | TATACA  | -----    | CCTATA |
| Oxyrhopus guibei_Rh1             | TCCTCTGG  | TTGGAT   | GGTCAAG | GATATAT  | CCCAGA   | AGGTAT  | GCAGAG | CTCATG | TGGAGT | TGATTAT | TATACA  | -----    | CCTATA |
| Philodryas patagoniensis_Rh1     | TCCTCTGA  | TTGGAT   | GGTCAAG | GATATAT  | CCCAGA   | AGGTAT  | GCAGAG | CTCATG | TGGAGT | TGATTAT | TATACA  | -----    | CCTATA |
| Python regius_Rh1                | TCCTCTGG  | TTGGAT   | GGTCAAG | GATATAT  | CCCAGA   | AGGTAT  | GCAGAG | CTCATG | TGGAGT | TGATTAT | TATACA  | -----    | CCTATA |
| Sibynomorphus mikanii_Rh1        | TCCTCTAG  | TTGGAT   | GGTCAAG | GATATAT  | CCCAGA   | AGGTAT  | GCAGAG | CTCATG | TGGAGT | TGATTAT | TATACG  | -----    | CCTATA |
| Sibynomorphus neuwiedi_Rh1       | TCCTCTGG  | TTGGAT   | GGTCAAG | GATATAT  | CCCAGA   | AGGTAT  | GCAGAG | CTCATG | TGGAGT | TGATTAT | TATACG  | -----    | CCTATA |
| Spilotes pullatus_Rh1            | TCCTCTGA  | TTGGAT   | GGTCAAG | GATATAT  | CCCAGA   | AGGTAT  | GCAGAG | CTCATG | TGGAGT | TGATTAT | TATACG  | -----    | CCTATA |
| Taeniophallus persimilis_Rh1     | TCCTCTGG  | TTGGAT   | GGTCAAG | GATATAT  | CCCAGA   | AGGTAT  | GCAGAG | CTCATG | TGGAGT | TGATTAT | TATACA  | -----    | CCTATA |
| Thamnodynastes strigatus_Rh1     | TCCTCTGA  | TTGGAT   | GGTCAAG | GATATAT  | CCCAGA   | AGGTAT  | GCAGAG | CTCATG | TGGAGT | TGATTAT | TATACA  | -----    | CCTATA |
| Tomodon dorsatus_Rh1             | TCCTCTGA  | TTGGAT   | GGTCAAG | GATATAT  | CCCAGA   | AGGTAT  | GCAGAG | CTCATG | TGGAGT | TGATTAT | TATACA  | -----    | CCTATA |
| Xenopeltis unicolor_Rh1          | TCCTCTGG  | TTGGAT   | GGTCAAG | GATATAT  | CCCAGA   | AGGTAT  | GCAGAG | CTCATG | TGGAGT | TGATTAT | TATACA  | -----    | CCTATA |
| Atractus reticulatus_LWS         | ACCAATCT  | TTTGGCT  | GGAGT   | AGATACT  | GGCCCC   | ATGGTCT | GAAAAC | TCTT   | TGTTGG | TCCAGAT | --GTAT  | TTCAGT   | GGCAAT |
| Chironius bicarinatus_LWS        | ACCAATCT  | TTTGGCT  | GGAGT   | AGATACT  | GGCCCC   | ATGGTCT | GAAAAC | TCTT   | TGTTGG | TCCAGAT | --GTAT  | TTCAGT   | GGCAAT |
| Dipsas petersi_LWS               | ACCAATGT  | TTTGGCT  | GGAGT   | AGATACT  | GGCCCC   | ATGGTCT | GAAAAC | TCTT   | TGTTGG | TCCAGAT | --GTAT  | TTCAGT   | GGCAAT |
| Echinantera cephalostriata_LWS   | RCCAATCT  | TTTGGCT  | GGAGT   | AGATACT  | GGCCCC   | ATGGTCT | GAAAAC | TCTT   | TGTTGG | TCCAGAT | --GTAT  | TTCAGT   | GGCAAT |
| Echinantera undulata_LWS         | GCCAATCT  | TTTGGCT  | GGAGT   | AGATACT  | GGCCCC   | ATGGTCT | GAAAAC | TCTT   | TGTTGG | TCCAGAT | --GTAT  | TTCAGT   | GGCAAT |
| Erythrolamprus aesculapii_LWS    | ACCAGTCT  | TTTGGCT  | GGAGT   | AGGTA    | CTGGCCCC | ATGGCT  | GAAAAC | TCTT   | TGTTGG | TCCAGAT | --GTAT  | TTCAGT   | GGCAAT |
| Erythrolamprus miliaris_LWS      | ACCAGTCT  | TTTGGCT  | GGAGT   | AGGTA    | CTGGCCCC | ATGGCT  | GAAAAC | TCTT   | TGTTGG | TCCAGAT | --GTAT  | TTCAGT   | GGCAAT |
| Erythrolamprus poecilogyrus_LWS  | ACCAATCT  | TTTGGCT  | GGAGT   | AGGTA    | CTGGCCCC | ATGGCT  | GAAAAC | TCTT   | TGTTGG | TCCAGAT | --GTAT  | TTCAGT   | GGCAAT |
| Helicops modestus_LWS            | GCCAATCT  | TTTGGCT  | GGAGT   | AGATACT  | GGCCCC   | ATGGTCT | GAAAAC | TCTT   | TGTTGG | TCCAGAT | --GTAT  | TTCAGT   | GGCAAT |
| Oxyrhopus guibei_LWS             | GCCAATCT  | TCGGCT   | GGAGT   | AGATACT  | GGCCCC   | ATGGTCT | GAAAAC | TCTT   | TGTTGG | TCCAGAT | --GTAT  | TTCAGT   | GGCAAT |
| Philodryas patagoniensis_LWS     | GCCAATCT  | TTTGGCT  | GGAGT   | AGATACT  | GGCCCC   | ATGGTCT | GAAAAC | TCTT   | TGTTGG | TCCAGAT | --GTAT  | TTCAGT   | GGCAAT |
| Python regius_LWS                | ACCAATCT  | TTTGGT   | TTGGAGT | AGATACT  | GGCCCC   | ATGGTCT | GAAAAC | TCTT   | TGTTGG | TCCAGAT | --GTAT  | TTCAGT   | GGCAAT |
| Sibynomorphus mikanii_LWS        | ACCAATGT  | TTTGGCT  | GGAGT   | AGATACT  | GGCCCC   | ATGGTCT | GAAAAC | TCTT   | TGTTGG | TCCAGAT | --GTAT  | TTCAGT   | GGCAAT |
| Sibynomorphus neuwiedi_LWS       | ACCAATGT  | TTTGGCT  | GGAGT   | AGATACT  | GGCCCC   | ATGGTCT | GAAAAC | TCTT   | TGTTGG | TCCAGAT | --GTAT  | TTCAGT   | GGCAAT |
| Spilotes pullatus_LWS            | ACCAATCT  | TTTGGCT  | GGAGT   | AGATACT  | GGCCCC   | ATGGTCT | GAAAAC | TCTT   | TGTTGG | TCCAGAT | --GTAT  | TTCAGT   | GGCAAT |
| Taeniophallus persimilis_LWS     | GCCAATCT  | TTTGGCT  | GGAGT   | AGATACT  | GGCCCC   | ATGGTCT | GAAAAC | TCTT   | TGTTGG | TCCAGAT | --GTAT  | TTCAGT   | GGCAAT |
| Thamnodynastes strigatus_LWS     | GCCAATCT  | TTTGGCT  | GGAGT   | AGATACT  | GGCCCC   | ATGGTCT | GAAAAC | TCTT   | TGTTGG | TCCAGAT | --GTAT  | TTCAGT   | GGCAAT |
| Tomodon dorsatus_LWS             | GCCAATCT  | TTTGGCT  | GGAGT   | AGATACT  | GGCCCC   | ATGGTCT | GAAAAC | TCTT   | TGTTGG | TCCAGAT | --GTAT  | TTCAGT   | GGCAAT |
| Xenopeltis unicolor_LWS          | ACCAATCT  | TTTGGCT  | GGAGT   | AGATACT  | GGCCCC   | ATGGTCT | GAAAAC | TCTT   | TGTTGG | TCCAGAT | --GTAT  | TTCAGT   | GGCAAT |
| Atractus reticulatus_SWS1        | GCCTTCT   | TTCGGCT  | GGAGC   | AGGTTT   | CCTCCG   | GAAGGG  | CTGCA  | ATGTT  | CCTCG  | GGTCCC  | GACTGGT | TACACGGT | GGGTAC |
| Chironius bicarinatus_SWS1       | CCCCTTCT  | TTTGGCT  | GGAGC   | AGGTTT   | CCTCCG   | GAAGGG  | CTGCA  | ATGTT  | CCTCG  | GGTCCC  | GACTGGT | TACACGGT | GGGTAC |
| Dipsas petersi_SWS1              | CCCCCTCT  | TTCGGCT  | GGAGC   | AGGTTT   | CCTCCG   | GAAGGG  | CTGCA  | ATGTT  | CCTCG  | GGTCCC  | GACTGGT | TACACGGT | GGGTAC |
| Echinantera cephalostriata_SWS1  | CCCCCTCT  | TTCGGCT  | GGAGC   | AGGTTT   | CCTCCG   | GAAGGG  | CTGCA  | ATGTT  | CCTCG  | GGTCCC  | GACTGGT | TACACGGT | GGGTAC |
| Echinantera undulata_SWS1        | CCCCCTCT  | TTCGGCT  | GGAGC   | AGGTTT   | CCTCCG   | GAAGGG  | CTGCA  | ATGTT  | CCTCG  | GGTCCC  | GACTGGT | TACACGGT | GGGTAC |
| Erythrolamprus aesculapii_SWS1   | CCCCCTCT  | TTCGGCT  | GGAGC   | AGGTTT   | CCTCCG   | GAAGGG  | CTGCA  | ATGTT  | CCTCG  | GGTCCC  | GACTGGT | TACACGGT | GGGTAC |
| Erythrolamprus miliaris_SWS1     | CCCCCTCT  | TTCGGCT  | GGAGC   | AGGTTT   | CCTCCG   | GAAGGG  | CTGCA  | ATGTT  | CCTCG  | GGTCCC  | GACTGGT | TACACGGT | GGGTAC |
| Erythrolamprus poecilogyrus_SWS1 | CCCCCTCT  | TTCGGCT  | GGAGC   | AGGTTT   | CCTCCG   | GAAGGG  | CTGCA  | ATGTT  | CCTCG  | GGTCCC  | GACTGGT | TACACGGT | GGGTAC |
| Helicops modestus_SWS1           | CCCCCTCT  | TTCGGCT  | GGAGC   | AGGTTT   | CCTCCG   | GAAGGG  | CTGCA  | ATGTT  | CCTCG  | GGTCCC  | GACTGGT | TACACGGT | GGGTAC |
| Oxyrhopus guibei_SWS1            | CCCCCTCT  | TTCGGCT  | GGAGC   | AGGTTT   | CCTCCG   | GAAGGG  | CTGCA  | ATGTT  | CCTCG  | GGTCCC  | GACTGGT | TACACGGT | GGGTAC |
| Philodryas patagoniensis_SWS1    | CCCCCTCT  | TTCGGCT  | GGAGC   | AGGTTT   | CCTCCG   | GAAGGG  | CTGCA  | ATGTT  | CCTCG  | GGTCCC  | GACTGGT | TACACGGT | GGGTAC |
| Python regius_SWS1               | CCCCCTCT  | TTTGGCT  | GGAGC   | AGGTTT   | CCTCCG   | GAAGGG  | CTGCA  | ATGTT  | CCTCG  | GGTCCC  | GACTGGT | TACACGGT | GGGTAC |
| Sibynomorphus mikanii_SWS1       | CCCCCTCT  | TTCGGCT  | GGAGC   | AGGTTT   | CCTCCG   | GAAGGG  | CTGCA  | ATGTT  | CCTCG  | GGTCCC  | GACTGGT | TACACGGT | GGGTAC |
| Sibynomorphus neuwiedi_SWS1      | CCCCCTCT  | TTCGGCT  | GGAGC   | AGGTTT   | CCTCCG   | GAAGGG  | CTGCA  | ATGTT  | CCTCG  | GGTCCC  | GACTGGT | TACACGGT | GGGTAC |
| Spilotes pullatus_SWS1           | CCCCCTCT  | TTTGGCT  | GGAGC   | AGGTTT   | CCTCCG   | GAAGGG  | CTGCA  | ATGTT  | CCTCG  | GGTCCC  | GACTGGT | TACACGGT | GGGTAC |
| Taeniophallus persimilis_SWS1    | CCCCCTCT  | TTCGGCT  | GGAGC   | AGGTTT   | CCTCCG   | GAAGGG  | CTGCA  | ATGTT  | CCTCG  | GGTCCC  | GACTGGT | TACACGGT | GGGTAC |
| Thamnodynastes strigatus_SWS1    | CCCCCTCT  | TTCGGT   | TTGGAGC | AGGTTT   | CCTCCG   | GAAGGG  | CTGCA  | ATGTT  | CCTCG  | GGTCCC  | GACTGGT | TACACGGT | GGGTAC |
| Tomodon dorsatus_SWS1            | CCCCCTCT  | TTCGGCT  | GGAGC   | AGGTTT   | CCTCCG   | GAAGGG  | CTGCA  | ATGTT  | CCTCG  | GGTCCC  | GACTGGT | TACACGGT | GGGTAC |
| Xenopeltis unicolor_SWS1         | GCCTTCT   | TTTGGCT  | GGAGC   | AGGTTT   | CCTCCG   | GAAGGG  | CTGCA  | ATGTT  | CCTCG  | GGTCCC  | GACTGGT | TACACGGT | GGGTAC |

731 740 750 760 770 780 790 800 810 820 830 840 850

Bos\_taurus\_Rh1 CATGTTCTGGTCCACTTCATCATCCCCCTGATTGTTCATATTTCTTCTGCTACGGGACGCTGGTGTACCCTCAAGGAGGGCGGCTGCCAGCAGCAGGAGTTCGGCCACCCTCAGAAGGC  
Atractus\_reticulatus\_Rh1 TATGTTCCCTTGACACTTTTATCATTCCATTGATGGTTATCTTCTTCTGCTATGGTCGTCTTCTCTGCAGTGTAAAGAGGCGGCTGCTCAGCAACAGGAATCAGCCACCACCCAGAAGGC  
Chironius\_bicarınatus\_Rh1 TATGTTCCCTTGACACTTTTGCACCTCCATTGACGGTTATCTTCTTCTGCTATGGTCGTCTTCTCTGCAGTGTAAAGAGGCGGCTGCTCAGCAACAGGAATCAGCCACCACCCAGAAGGC  
Dipsas\_petersi\_Rh1 TATGTTCCCTTGACACTTTTCTCATTCCCTTTGACGGTTATCTTCTTCTGCTATGGTCGTCTTCTCTGCAGTGTAAAGAGGCGGCTGCTCAGCAACAGGAATCAGCCACCACCCAGAAGGC  
Echınantera\_cephalostriata\_Rh1 TATGTTCCCTTGACACTTTTGCACCTCCATTGACGATTATCTTCTTCTGCTATGGTCGTCTTCTCTCGCGTGTAAAGAGGCTGCTGCTCAGCAACAGGAATCAGCCACCACCCAGAAGGC  
Echınantera\_undulata\_Rh1 TATGTTCCCTTGACACTTTTGCACCTCCATTGACGATTATCTTCTTCTGCTATGGTCGTCTTCTCTGCAGTGTAAAGAGGCTGCTGCTCAGCAACAGGAATCAGCCACCACCCAGAAGGC  
Erythrolamprus\_aesculapıi\_Rh1 CATGTTCCCTTGACACTTTTGCACCTCCATTGACGGTTATCTTCTTCTGCTATGGTCGTCTTCTCTGCAGTGTAAAGAGGCTGCTGCTCAGCAACAGGAATCAGCCACCACCCAGAAGGC  
Erythrolamprus\_mıliaris\_Rh1 CATGTTCCCTTGACACTTTTGCACCTCCRTTGACGGTTATCTTCTTCTGCTATGGTCGTCTTCTCTGCAGTGTAAAGAGGCTGCTGCTCAGCAACAGGAATCAGCCACCACCCAGAAGGC  
Erythrolamprus\_poecılogyrus\_Rh1 CATGTTCCCTTGACACTTTTGCACCTCCATTGACGGTTATCTTCTTCTGCTATGGTCGTCTTCTCTGCAGTGTAAAGAGGCTGCTGCTCAGCAACAGGAATCAGCCACCACCCAGAAGGC  
Helıcops\_modestus\_Rh1 TATGTTCCCTTGACACTTTTGCACCTCCATTGACGGTTATCTTCTTCTGCTATGGTCGTCTTCTCTGCAGTGTAAAGAGGCTGCTGCTCAGCAACAGGAATCAGCCACCACCCAGAAGGC  
Oxyrhopus\_guıbei\_Rh1 TATGTTCCCTTGACACTTTTATGATTCCATTGATTGTATCTTCTTCTGCTATGGTCGTCTTCTCTGCAGTGTAAAGAGGCTGCTGCTCAGCAACAGGAATCAGCCACCACCCAGAAGGC  
Philodryas\_patagonıensis\_Rh1 TATGTTCCCTTGACACTTTTGCACCCATTGACGGTTATCTTCTTCTGCTATGGTCGTCTTCTCTGCAGTGTAAAGAGGCTGCTGCTCAGCAACAGGAATCAGCCACCACCCAGAAGGC  
Python\_regıus\_Rh1 TATGTTTATTGTACATTTTGCATTCCATTGGTGGTTATCTTTTCTGCTATGGACGCTCTGTCTGCAGTGTAAAGAGGCTGCTGCTCAGCAACAGGAATCAGCCACCACCCAGAAGGC  
Sıbınomorphus\_mıkanıı\_Rh1 TATGTTCCCTTGACACTTTTGCACCTCCATTGACGGTTATCTTCTTCTGCTATGGTCGTCTTCTCTGCAGTGTAAAGAGGCGGCTGCTCAGCAACAGGAATCAGCCACCACCCAGAAGGC  
Sıbınomorphus\_neuwıedı\_Rh1 TATGTTCCCTTGACACTTTTCTCATTCCATTGACGGTTATCTTCTTCTGCTATGGTCGTCTTCTCTGCAGTGTAAAGAGGCGGCTGCTCAGCAACAGGAATCAGCCACCACCCAGAAGGC  
Spılotes\_pullatus\_Rh1 TATGTTCCCTTGACACTTTTGCACCTCCATTGACGGTTATCTTCTTCTGCTACGGTCGTCTTGTCTGCAGTGTAAAGAGGCTGCTGCTCAGCAACAGGAGTTCAGCCACCACCCAGAAGGC  
Taenıophallus\_persııılıs\_Rh1 TATGTTCCCTTGACACTTTTGCACCTCCATTGACGATTATCTTCTTCTGCTATGGTCGTCTTCTCTGCAGTGTAAAGAGGCTGCTGCTCAGCAACAAGAAATCAGCCACCACCCAGAAGGC  
Thamnodynastes\_strıgatus\_Rh1 TATGTTCCCTTGACACTTTTGCACCTCCATTGACGGTTATCTTCTTCTGCTATGGTCGTCTTCTCTGCAGTGTAAAGAGGCTGCTGCTCAGCAACAGGAATCAGCCACCACCCAGAAGGC  
Tomodon\_dorsatus\_Rh1 TATGTTCCCTTGACACTTTTGCACCTCCATTGACGGTTATCTTCTTCTGCTATGGTCGTCTTCTCTGCAGTGTAAAGAGGCTGCTGCTCAGCAACAGGAATCAGCCACCACCCAGAAGGC  
Xenopeltıs\_unicolor\_Rh1 TATGTTCCCTTGACACTTTTATCATTCCAATGATAGTTATCTTCTTCTGCTACGGACGCTCTGTCTGCAGTGTAAAGAGGCTGCTGCTCAGCAACAGGAATCAGCCACCACCCAGAAGGC  
Atractus\_retıculatus\_LWS CCTGATGATTACCTGTTGTGATAATTTCCCCTGAGCATCATCATTCTCTGTACTTTCGCAAGTGTGGATGGCTATCCGTGCGGTTGACGCCAGCAGAAAGAGTCAGAATCAACACAGAAGGC  
Chırınıus\_bıcarınatus\_LWS CCTGATGATTACCTGTTGTGCAATTTCCCCTGAGCGTCATCATTATCTGTTACTTTCGCAAGTGTGGCTGGCTATCCGTGCGGTTGACGCCAGCAGAAAGAGTCAGAATCAACACAGAAGGC  
Dıpsas\_petersı\_LWS CCTGATGATTACCTGTTGTGATAATTTCCCCTGAGCATCATCATTCTCTGTACTTTCGCAAGTGTGGATGGCTATCCGTGCGGTTGACGCCAGCAGAAAGAGTCAGAATCAACACAGAAGGC  
Echınantera\_cephalostriata\_LWS CCTGATGATTACCTGTTGTGCAATTTCCCCTGAGCGTCATCATTATCTGTTACTTTCGCAAGTGTGGCTGGCTATCCGTGCGGTTGACGCCAGCAGAAAGAGTCAGAATCAACACAGAAGGC  
Echınantera\_undulata\_LWS CCTGATGATTACCTGTTGTGCAATTTCCCCTGAGTGCATCATTATCTGTTACTTTCGCAAGTGTGGCTGGCTATCCGTGCGGTTGACGCCAGCAGAAAGAGTCAGAATCAACACAGAAGGC  
Erythrolamprus\_aesculapıı\_LWS CCTGATGATTACCTGTTGTGCAATTTCCCCTGAGCGTCATCGTTATCTGCTACTTTCGCAAGTGTGGATGGCTATCCGTGCGGTTGACGCCAGCAGAAAGAGTCAGAATCAACACAGAAGGC  
Erythrolamprus\_mıliaris\_LWS CCTGATGATTACCTGTTGTGCAATTTCCCCTGAGCGTCATCGTTATCTGCTACTTTCGCAAGTGTGGATGGCTATCCGTGCGGTTGACGCCAGCAGAAAGAGTCAGAATCAACACAGAAGGC  
Erythrolamprus\_poecılogyrus\_LWS CCTGATGACTACCTGTTGTGATAATTTCCCCTGAGCGTCATCATTATCTGCTACTTTCGCAAGTGTGGATGGCTATCCGTGCGGTTGACGCCAGCAGAAAGAGTCAGAATCAACACAGAAGGC  
Helıcops\_modestus\_LWS CCTGATGTCTACTGTTGTGATAATTTCCCCTAAGCGTTATCATTATCTGTTACTTTCGCAAGTGTGGCTGGCTATCCGTGCGGTTGACGCCAGCAGAAAGAGTCAGAATCAACACAGAAGGC  
Oxyrhopus\_guıbei\_LWS CCTGATGATTACCTGTTGTGATAATTTCCCCTGAGCAATTAATTTATCTGTTACTTTCGCAAGTGTGGCTGGCTATCCGTGCGGTTGCGGCCAGCAGAAAGAGTCGGAATCAACCCAGAAGGC  
Philodryas\_patagonıensis\_LWS CCTGATGATTACCTGTTGTGCAATTTCCCCTGAGCGTCATCATTATCTGTTACTTTCGCAAGTGTGGCTGGCTATCCGTGCGGTTGACGCCAGCAGAAAGAGTCAGAATCAACACAGAAGGC  
Python\_regıus\_LWS CCTGATGGTCACTGTTGCATAATTTCCCCTGAGCATCATCTGCTCTGCTACATGCAAGTGTGGATGGCTATCCGTGCGGTTGACGCCAGCAGAAAGAGTCAGAATCGACACAGAAGGC  
Sıbınomorphus\_mıkanıı\_LWS CCTGATGATTACCTGTTGTGATAATTTCCCCTGAGCATCATCATTCTCTGTACTTTCGCAAGTGTGGATGGCTATCCGTGCGGTTGACGCCAGCAGAAAGAGTCAGAATCAACACAGAAGGC  
Sıbınomorphus\_neuwıedı\_LWS CCTGATGATTACCTGTTGTGATAATTTCCCCTGAGCATCATCATTCTCTGTTACTTTCGCAAGTGTGGATGGCTATCCGTGCGGTTGACGCCAGCAGAAAGAGTCAGAATCAACACAGAAGGC  
Spılotes\_pullatus\_LWS CCTGATGATTACTTGTGTGCAATTTCCCCTGAGCGTCATCATTATCTGTTACTTTCGCAAGTGTGGATGGCTATCCGTGCGGTTGACGCCAGCAGAAAGAAATCAGAATCAACACAGAAGGC  
Taenıophallus\_persııılıs\_LWS CCTGATGATTACCTGTTGTGCAATTTCCCCTGAGCGTCATCATTATCTGTTACTTTCGCAAGTGTGGCTGGCTATCCGTGCGGTTGACGCCAGCAGAAAGAGTCAGAATCAACACAGAAGGC  
Thamnodynastes\_strıgatus\_LWS CCTGATGAGTACCTGTTGTGATAATTTCCCCTGAGCGTTATCATTCTCTGTACTACATAACAAGTGTGGCTGGCTATCCGTGCGGTTGACGCCAGCAGAAAGAGTCAGAATCAACACAGAAGGC  
Tomodon\_dorsatus\_LWS CCTGATGATCACCTGTTGCGTAAATTTCCCCTAAGCATCATCATTCTCTGTTACTTTCGCAAGTGTGGATGGCTATCCGTGCGGTTGACGCCAGCAGAAAGAGTCAGAATCAACACAGAAGGC  
Xenopeltıs\_unicolor\_LWS CCTTTTCATCTTCTGTTCATCATAACCCTGACCCTCATCATCTTCTCCTACGCGCGGCTCCTAGGTGCCCTCCGGGGCGGTAGCCGCTCAGCAGCAAGAGTCAGCCACTACCCAGAAGGC  
Atractus\_retıculatus\_SWS1 CCTTTTCATCTTCTGTTCATCATAACCCTGACCCTCATCATCTTCTCCTACGCGCGGCTCCTAGGTGCCCTCCGGGGCGGTAGCCGCTCAGCAGCAAGAGTCAGCCACTACCCAGAAGGC  
Chırınıus\_bıcarınatus\_SWS1 CCTTTTCATCTTCTGTTCATCATAACCCTGACCCTCATCATCTTCTCCTACGCGCGGCTCCTAGGTGCCCTCCGGGGCGGTAGCCGCTCAGCAGCAAGAGTCAGCCACCACCCAGAAGGC  
Dıpsas\_petersı\_SWS1 CCTTTTCATCTTCTGTTCATCATAACCCTGACCCTCATCATCTTCTCCTACGCGCGGCTCCTAGGTGCCCTCCGGGGCGGTAGCCGCTCAGCAGCAAGAGTCAGCCACTACCCAGAAGGC  
Echınantera\_cephalostriata\_SWS1 CCTTTTCATCTTCTGTTCATCATAACCCTGACCCTCATCATCTTCTCCTACGCGCGGCTCCTAGGTGCCCTCCGGGGCGGTAGCCGCTCAGCAGCAAGAAATCAGCCACCACCCAGAAGGC  
Echınantera\_undulata\_SWS1 CCTTTTCATCTTCTGTTCATCATAACCCTGACCCTCATCATCTTCTCCTACGCGCGGCTCCTAGGTGCCCTCCGGGGCGGTAGCCGCTCAGCAGCAAGAAATCAGCCACCACCCAGAAGGC  
Erythrolamprus\_aesculapıı\_SWS1 CCTTTTCATCTTCTGTTCATCATAACCCTGACCCTCATCATCTTCTCCTACGCGCGGCTCCTAGGTGCCCTCCGGGGCGGTAGCCGCTCAGCAGCAAGAAATCAGCCACCACCCAGAAGGC  
Erythrolamprus\_mıliaris\_SWS1 CCTTTTCATCTTCTGTTCATCATAACCCTGACCCTCATCATCTTCTCCTACGCGCGGCTCCTAGGTGCCCTCCGGGGCGGTAGCCGCTCAGCAGCAAGAAATCAGCCACCACCCAGAAGGC  
Erythrolamprus\_poecılogyrus\_SWS1 CCTTTTCATCTTCTGTTCATCATAACCCTGACCCTCATCATCTTCTCCTACGCGCGGCTCCTAGGTGCCCTCCGGGGCGGTAGCCGCTCAGCAGCAAGAAATCAGCCACCACCCAGAAGGC  
Helıcops\_modestus\_SWS1 CCTTTTCATCTTCTGTTCATCATAACCCTGACCCTCATCATCTTCTCCTACGCGCGGCTCCTAGGTGCCCTCCGGGGCGGTAGCCGCTCAGCAGCAAGAAATCAGCCACCACCCAGAAGGC  
Oxyrhopus\_guıbei\_SWS1 CCTTTTCATCTTCTGTTCATCATAACCCTGACCCTCATCATCTTCTCCTACGCGCGGCTCCTAGGTGCCCTCCGGGGCGGTAGCCGCTCAGCAGCAAGAAATCAGCCACCACCCAGAAGGC  
Philodryas\_patagonıensis\_SWS1 CCTTTTCATCTTCTGTTCATCATAACCCTGACCCTCATCATCTTCTCCTACGCGCGGCTCCTAGGTGCCCTCCGGGGCGGTAGCCGCTCAGCAGCAAGAAATCAGCCACCACCCAGAAGGC  
Python\_regıus\_SWS1 CCTTTTCATCTTCTGTTCATCATAACCCTGACCCTCATCATCTTCTCCTACGCGCGGCTCCTAGGTGCCCTCCGGGGCGGTAGCCGCTCAGCAGCAAGAAATCAGCCACCACCCAGAAGGC  
Sıbınomorphus\_mıkanıı\_SWS1 CCTTTTCATCTTCTGTTCATCATAACCCTGACCCTCATCATCTTCTCCTACGCGCGGCTCCTAGGTGCCCTCCGAGCGGTAGCCGCTCAGCAGCAAGAGTCAGCCACTACCCAGAAGGC  
Sıbınomorphus\_neuwıedı\_SWS1 CCTTTTCATCTTCTGTTCATCATAACCCTGACCCTCATCATCTTCTCCTACGCGCGGCTCCTAGGTGCCCTCCGAGCGGTAGCCGCTCAGCAGCAAGAGTCAGTACTACCCAGAAGGC  
Spılotes\_pullatus\_SWS1 CCTTTTCATCTTCTGTTCATCATAACCCTGACCCTCATCATCTTCTCCTACGCGCGGCTCCTAGGTGCCCTCCGGGGCGGTAGCCGCTCAGCAGCAAGAGTCAGCCACCACCCAGAAGGC  
Taenıophallus\_persııılıs\_SWS1 CCTTTTCATCTTCTGTTCATCATAACCCTGACCCTCATCATCTTCTCCTACGCGCGGCTCCTAGGTGCCCTCCGGGGCGGTAGCCGCTCAGCAGCAAGAAATCAGCCACCACCCAGAAGGC  
Thamnodynastes\_strıgatus\_SWS1 CCTTTTCATCTTCTGTTCATCATAACCCTGACCCTCATCATCTTCTCCTACGCGCGGCTCCTAGGTGCCCTCCGGGGCGGTAGCCGCTCAGCAGCAAGAAATCAGCCACCACCCAGAAGGC  
Tomodon\_dorsatus\_SWS1 CCTTTTCATCTTCTGTTCATCATAACCCTGACCCTCATCATCTTCTCCTACGCGCGGCTCCTAGGTGCCCTCCGGGGCGGTAGCCGCTCAGCAGCAAGAAATCAGCCACCACCCAGAAGGC  
Xenopeltıs\_unicolor\_SWS1 CCTTTTCATCTTCTGTTCATCATAACCCTGACCCTCATCATCTTCTCCTACCTGCAGTGTCTGCTGCCCTCCGGGGCGGTAGCTGCTCAGCAGCAGGAGTCAGCCACCACCCAGAAGGC





2011 2020 2030 2040 2050 2050 2060 2070 2080 2090 2100 2110 2120

Bos\_taurus\_Rh1 CTTTCATGACCATCCCAGCTTTCTTTGCAAGAGCTTCTGCCGTCTACAACCCCGTCATCTACATCATGATGAACAAGCAGTTCGGAACTGCATGGTCACCCTCTCTGCTGTGGCAAGAA  
Atractus\_reticulatus\_Rh1 CTTTATGACCATCCCAGCTTTCTTTGCAAGAGCTCTGCAATCTACAACCCAGTGATTTATATCGTAATGAACAAACAGTTCGGCAATTGTATGATCACCACACTTTGCTGTGGAAAGAA  
Chironius\_bicarinatus\_Rh1 CTTTATGACCATCCCACCTTCTTTGCAAGAGCTCTGCAATCTACAACCCAGTGATTTATATCGTAATGAACAAACAGTTCGGCAACTGTATGCTCACCACACTTTGCTGTGGAAAGAA  
Dipsas\_petersi\_Rh1 CTTTATGACCATCCCAGCTTTCTTTGCAAGAGCTCTCAATCTACAACCCAGTGATTTATATCGTAATGAACAAACAGTTCGGCAATTGTATGATCACCACACTTTGCTGTGGAAAGAA  
Echinantera\_cephalostriata\_Rh1 CTTTATGACCATCCCAGCTTTCTTTGCAAGAGCTCTGCAATCTACAACCCAGTGATTTATATCGTAATGAACAAACAGTTCGGCAATTGTATGCTCACCACACTTTGCTGTGGAAAGAA  
Echinantera\_undulata\_Rh1 CTTTATGACCATCCCAGCTTTCTTTGCAAGAGCTCTGCAATCTACAACCCAGTGATTTATATCGTAATGAACAAACAGTTCGGCAATTGTATGCTCACCACACTTTGCTGTGGAAAGAA  
Erythrolamprus\_aesculapii\_Rh1 CTTTATGACCATCCCAGCTTTCTTTGCAAGAGCTCTGCAATCTACAACCCAGTGATTTATATCGTAATGAACAAACAGTTCGGCAATTGTATGCTCACCACACTTTGCTGTGGAAAGAA  
Erythrolamprus\_miliaris\_Rh1 CTTTATGACCATCCCAGCTTTCTTTGCAAGAGCTCTGCAATCTACAACCCAGTGATTTATATCGTAATGAACAAACAGTTCGGCAATTGTATGCTCACCACACTTTGCTGTGGAAAGAA  
Erythrolamprus\_poeilogyrus\_Rh1 CTTTATGACCATCCCAGCTTTCTTTGCAAGAGCTCTGCAATCTACAACCCAGTGATTTATATCGTAATGAACAAACAGTTCGGCAATTGTATGCTCACCACACTTTGCTGTGGAAAGAA  
Helicops\_modestus\_Rh1 CTTTATGACCATCCCAGCTTTCTTTGCAAGAGCTCTGCAATCTACAACCCAGTGATTTATATCGTAATGAACAAACAGTTCGGCAATTGTATGCTCACCACACTTTGCTGTGGAAAGAA  
Oxyrhopus\_guibeii\_Rh1 CTTTATGACCATCCCAGCTTTCTTTGCAAGAGCTCTCAATCTACAACCCAGTGATTTATATCGTAATGAACAAACAGTTCGGCAATTGTATGATCACCACACTTTGCTGTGGAAAGAA  
Philodryas\_patagoniensis\_Rh1 CTTTATGACCATCCCAGCTTTCTTTGCAAGAGCTCTGCAATCTACAACCCAGTGATTTATATCGTAATGAACAGACAGTTCGGCAATTGTATGCTCACCACACTTTGCTGTGGAAAGAA  
Python\_regius\_Rh1 CTTTATGACCATCCCAGCTTTCTTTGCAAGAGCTCTGCAATCTACAACCCAGTGATTTATATCGTAATGAACAAACAGTTCGGCAACTGTATGATCACCACACTTTGCTGTGGAAAGAA  
Sibynomorphus\_mikanii\_Rh1 CTTTATGACCATCCCAGCTTTCTTTGCAAGAGCTCTCAATCTACAACCCAGTGATTTATATCGTAATGAACAAACAGTTCGGCAATTGTATGATCACCACACTTTGCTGTGGAAAGAA  
Sibynomorphus\_neuwiedii\_Rh1 CTTTATGACCATCCCAGCTTTCTTTGCAAGAGCTCTCAATCTACAACCCAGTGATTTATATCGTAATGAACAAACAGTTCGGCAATTGTATGATCACCACACTTTGCTGTGGAAAGAA  
Spilotes\_pullatus\_Rh1 CTTTATGACCATCCCAGCTTTCTTTGCAAGAGCTCTGCAATCTACAACCCAGTGATTTATATCGTAATGAACAAACAGTTCGGCAACTGTATGATCACCACACTTTGCTGTGGAAAGAA  
Taeniophallus\_persimilis\_Rh1 CTTTATGACCATCCCAGCTTTCTTTGCAAGAGCTCTGCAATCTACAACCCAGTGATTTATATCGTAATGAACAAACAGTTCGGCAATTGTATGCTCACCACACTTTGCTGTGGAAAGAA  
Thamnodynastes\_strigatus\_Rh1 CTTTATGACCATCCCAGCTTTCTTTGCAAGAGCTCTGCAATCTACAACCCAGTGATTTATATCGTAATGAACAAACAGTTCGGCAATTGTATGCTCACCACACTTTGCTGTGGAAAGAA  
Tomodon\_dorsatus\_Rh1 CTTTATGACCATCCCAGCTTTCTTTGCAAGAGCTCTGCAATCTACAACCCAGTGATTTATATCGTAATGAACAAACAGTTCGGCAATTGTATGCTCACCACACTTTGCTGTGGAAAGAA  
Xenopeltis\_unicolor\_Rh1 CTTTATGACCATCCCAGCTTTCTTTGCAAGAGCTCTGCAATCTACAACCCAGTGATTTATATCGTAATGAACAAACAGTTCGGCAACTGTATGATCACCACACTTTGCTGTGGAAAGAA  
Atractus\_reticulatus\_LWS GACAGCTTCCCTGCCTGCCTTTTGGCAAAAAGCGCCACCATTACAACCCAATTATCTATGTCTTCATGAACAGACAGTTCGGCAATTGCATAATGC-----AG  
Chironius\_bicarinatus\_LWS GACGGCTTCCATGCCCTGCCTTTTGGCAAAAAGCGCCACCATTACAACCCAATTATCTATGTCTTCATGAACAGACAGTTCGGCAATTGCATAATGC-----AG  
Dipsas\_petersi\_LWS GACAGCTTCCCTGCCTGCCTTTTGGCAAAAAGCGCCACCATTACAACCCAATTATCTACGTCTTCATGAACAGACAGTTCGGCAATTGCATAATGC-----AG  
Echinantera\_cephalostriata\_LWS GACAGCTTCCATGCCCTGCCTTTTGGCAAAAAGCGCCACCATTACAACCCAATTATCTATGTCTTCATGAACAGACAGTTCGGCAATTGCATAATGC-----AG  
Echinantera\_undulata\_LWS GACAGCTTCCATGCCCTGCCTTTTGGCAAAAAGCGCCACCATTACAACCCAATTATCTATGTCTTCATGAACAGACAGTTCGGCAATTGCATAATGC-----AG  
Erythrolamprus\_aesculapii\_LWS GACAGCTTCCATGCCCTGCCTTTTGGCAAAAAGCGCCACCATTACAACCCAATTATCTATGTCTTCATGAACAGACAGTTCGGCAATTGCATAATGC-----AG  
Erythrolamprus\_miliaris\_LWS GACAGCTTCCATGCCCTGCCTTTTGGCAAAAAGCGCCACCATTACAACCCAATTATCTATGTCTTCATGAACAGACAGTTCGGCAATTGCATAATGC-----AG  
Erythrolamprus\_poeilogyrus\_LWS GACAGCTTCCATGCCCTGCCTTTTGGCAAAAAGCGCCACCATTACAACCCAATTATCTATGTCTTCATGAACAGACAGTTCGGCAATTGCATAATGC-----AG  
Helicops\_modestus\_LWS GGCAGCTTCCCTGCCTGCCTTTTGGCAAAAAGCGCCACCATTACAACCCAATTATCTATGTCTTCATGAACAGACAGTTCGGCAATTGCATAATGC-----AG  
Oxyrhopus\_guibeii\_LWS GACAGCTTCCATGCCCTGCCTTTTGGCAAAAAGCGCCACCATTACAACCCAATTATCTATGTCTTCATGAACAGACAGTTCGGCAATTGCATAATGC-----AG  
Philodryas\_patagoniensis\_LWS GACAGCTTCCATGCCCTGCCTTTTGGCAAAAAGCGCTACCATTACAACCCAATTATCTATGTCTTCATGAACAGACAGTTCGGCAATTGCATAATGC-----AG  
Python\_regius\_LWS GACAGCTTCTTGGCTGCCTTTTGGCAAAAAGCGCCACCATTACAACCCAATTATCTATGTCTTCATGAACAGACAGTTCGGCAATTGCATAATGC-----AG  
Sibynomorphus\_mikanii\_LWS GACAGCTTCCCTGCCTGCCTTTTGGCAAAAAGCGCCACCATTACAACCCAATTATCTACGTCTTCATGAACAGACAGTTCGGCAATTGCATAATGC-----AG  
Sibynomorphus\_neuwiedii\_LWS GACAGCTTCCCTGCCTGCCTTTTGGCAAAAAGCGCCACCATTACAACCCAATTATCTATGTCTTCATGAACAGACAGTTCGGCAATTGCATAATGC-----AG  
Spilotes\_pullatus\_LWS GACGGCTTCCATACCTGCCTTTTGGCAAAAAGCGCCACCATTACAACCCAATTATCTATGTCTTCATGAACAGACAGTTCGGCAATTGCATAATGC-----AG  
Taeniophallus\_persimilis\_LWS GACAGCTTCCATGCCCTGCCTTTTGGCAAAAAGCGCCACCATTACAACCCAATTATCTATGTCTTCATGAACAGACAGTTCGGCAATTGCATAATGC-----AG  
Thamnodynastes\_strigatus\_LWS GACAGCTTCCATGCCCTGCCTTTTGGCAAAAAGCGCCACCATTACAACCCAATTATCTATGTCTTCATGAACAGACAGTTCGGCAATTGCATAATGC-----AG  
Tomodon\_dorsatus\_LWS GACAGCTTCCATGCCCTGCCTTTTGGCAAAAAGCGCCACCATTACAACCCAATTATCTATGTCTTCATGAACAGACAGTTCGGCAATTGCATAATGC-----AG  
Xenopeltis\_unicolor\_LWS GACAGCTTCTTGGCTGCCTTTTGGCAAAAAGCGCCACCATTACAACCCAATTATCTATGTCTTCATGAACAGACAGTTCGGCAATTGCATAATGC-----AG  
Atractus\_reticulatus\_SWS1 CTTGGTCACCATCCCAGCTTTCTTTGCAAGAGCTCCTGCGTCTACAACCCCATCATCTACTGCTTCATGAACAAGCAGTTCGGTCCCTGCATCATGGAACCGGTGTGCGGC-----AA  
Chironius\_bicarinatus\_SWS1 CTTGGTCACCATCCCAGCTTTCTTTGCAAGAGCTCCTGCGTCTACAACCCCATCATCTACTGCTTCATGAACAAGCAGTTCGGTCCCTGCATCATGGAACCGGTGTGCGGC-----AA  
Dipsas\_petersi\_SWS1 CTTGGTCACCATCCCAGCTTTCTTTGCAAGAGCTCCTGCGTCTATAACCCCATCATCTACTGCTTCATGAACAAGCAGTTCGGTCCCTGCATCATGGAACCGGTGTGCGGC-----AA  
Echinantera\_cephalostriata\_SWS1 CTTGGTCACCATCCCAGCTTTCTTTGCAAGAGCTCCTGCGTCTACAACCCCATCATCTACTGCTTCATGAACAAGCAGTTCGGGCGCTGCATCATGGAACCGGTGTGCGGC-----AA  
Echinantera\_undulata\_SWS1 CTTGGTCACCATCCCAGCTTTCTTTGCAAGAGCTCCTGCGTCTACAACCCCATCATCTACTGCTTCATGAACAAGCAGTTCGGGCGCTGCATCATGGAACCGGTGTGCGGC-----AA  
Erythrolamprus\_aesculapii\_SWS1 CTTGGTCACCATCCCAGCTTTCTTTGCAAGAGCTCCTGCGTCTACAACCCCATCATCTACTGCTTCATGAACAAGCAGTTCGGTCCCTGCATCATGGAACCGGTGTGCGGC-----AA  
Erythrolamprus\_miliaris\_SWS1 CTTGGTCACCATCCCAGCTTTCTTTGCAAGAGCTCCTGCGTCTACAACCCCATCATCTACTGCTTCATGAACAAGCAGTTCGGTCCCTGCATCATGGAACCGGTGTGCGGC-----AA  
Erythrolamprus\_poeilogyrus\_SWS1 CTTGGTCACCATCCCAGCTTTCTTTGCAAGAGCTCCTGCGTCTACAACCCCATCATCTACTGCTTCATGAACAAGCAGTTCGGTCCCTGCATCATGGAACCGGTGTGCGGC-----AA  
Helicops\_modestus\_SWS1 CTTGGTCACCATCCCAGCTTTCTTTGCAAGAGCTCCTGCGTCTACAACCCCATCATCTACTGCTTCATGAACAAGCAGTTCGGTCCCTGCATCATGGAACCGGTGTGCGGC-----AA  
Oxyrhopus\_guibeii\_SWS1 CTTGGTCACCATCCCAGCTTTCTTTGCAAGAGCTCCTGCGTCTACAACCCCATCATCTACTGCTTCATGAACAAGCAGTTCGGTCCCTGCATCATGGAACCGGTGTGCGGC-----AA  
Philodryas\_patagoniensis\_SWS1 CTTGGTCACCATCCCAGCTTTCTTTGCAAGAGCTCCTGCGTCTACAACCCCATCATCTACTGCTTCATGAACAAGCAGTTCGGTCCCTGCATCATGGAACCGGTGTGCGGC-----AA  
Python\_regius\_SWS1 CTTGGTCACCATCCCAGCTTTCTTTGCAAGAGTTCCTGCGTCTACAACCCCATCATCTACTGCTTCATGAACAAGCAGTTCGGTCCCTGCATCATGGAACCGGTGTGCGGC-----AA  
Sibynomorphus\_mikanii\_SWS1 CTTGGTCACCATCCCAGCTTTCTTTGCAAGAGCTCCTGCGTCTACAACCCCATCATCTACTGCTTCATGAACAAGCAGTTCGGTCCCTGCATCATGGAACCGGTGTGCGGC-----AA  
Sibynomorphus\_neuwiedii\_SWS1 CTTGGTCACCATCCCAGCTTTCTTTGCAAGAGCTCCTGCGTCTACAACCCCATCATCTACTGCTTCATGAACAAGCAGTTCGGTCCCTGCATCATGGAACCGGTGTGCGGC-----AA  
Spilotes\_pullatus\_SWS1 CTTGGTCACCATCCCAGCTTTCTTTGCAAGAGCTCCTGCGTCTATAACCCCATCATCTACTGCTTCATGAACAAGCAGTTCGGTCCCTGCATCATGGAACCGGTGTGCGGC-----AA  
Taeniophallus\_persimilis\_SWS1 CTTGGTCACCATCCCAGCTTTCTTTGCAAGAGCTCCTGCGTCTACAACCCCATCATCTACTGCTTCATGAACAAGCAGTTCGGTCCCTGCATCATGGAACCGGTGTGCGGC-----AA  
Thamnodynastes\_strigatus\_SWS1 CTTGGTCACCATCCCAGCTTTCTTTGCAAGAGCTCCTGCGTCTACAACCCCATCATCTACTGCTTCATGAACAAGCAGTTCGGTCCCTGCATCATGGAACCGGTGTGCGGC-----AA  
Tomodon\_dorsatus\_SWS1 CTTGGTCACCATCCCAGCTTTCTTTGCAAGAGCTCCTGCGTCTACAACCCCATCATCTACTGCTTCATGAACAAGCAGTTCGGTCCCTGCATCATGGAACCGGTGTGCGGC-----AA  
Xenopeltis\_unicolor\_SWS1 TTTGGTCACCATCCCAGCTTTCTTTGCAAGAGCTCCTGCGTCTACAACCCCATCATCTACTGCTTCATGAACAAGCAGTTCGGTCCCTGCATCATGGAACCGGTGTGCGGC-----AA





|                                 | 212          | 213        | 214     | 215      | 216   | 217  | 218    | 219    | 220 | 221  | 222  | 223  | 224   |
|---------------------------------|--------------|------------|---------|----------|-------|------|--------|--------|-----|------|------|------|-------|
| Bos_taurus_Rh1                  | GEIALWSLVVLA | AIERYVVVCK | PMSNFRF | TETHAIMG | VAF   | TWV  | MALACA | APPLV  | GW  | SRYI | PEGM | QCS  | CGIDY |
| Atractus_reticulatus_Rh1        | GEIALWSLVVLA | VERYVVVCK  | PMSNFRF | TETHAIMG | VAF   | TWV  | MALACA | APPLV  | GW  | SRYI | PEGM | QCS  | CGIDY |
| Chironius_bicarinatus_Rh1       | GEIALWSLVVLA | VERYVVVCK  | PMSNFRF | TETHAIMG | LSL   | TWV  | MALACA | APPLI  | GW  | SRYI | PEGM | QCS  | CGVDY |
| Dipsas_petersi_Rh1              | GEIALWSLVVLA | AIERYVVVCK | PMSNFRF | TETHAIMG | VAF   | TWV  | MALACA | APPLV  | GW  | SRYI | PEGM | QCS  | CGIDY |
| Echinantera_cephalostriata_Rh1  | GEIALWSLVVLA | VERYVVVCK  | PMSNFRF | TETHAIMG | VSL   | TWV  | MALACA | APPLV  | GW  | SRYI | PEGM | QCS  | CGVDY |
| Echinantera_undulata_Rh1        | GEIALWSLVVLA | VERYVVVCK  | PMSNFRF | TETHAIMG | VSL   | TWV  | MALACA | APPLV  | GW  | SRYI | PEGM | QCS  | CGVDY |
| Erythrolamprus_aesculapii_Rh1   | GEIALWSLVVLA | VERYVVVCK  | PMSNFRF | TETHAIMG | VSL   | TWV  | MALACA | APPLI  | GW  | SRYI | PEGM | QCS  | CGVDY |
| Erythrolamprus_miliaris_Rh1     | GEIALWSLVVLA | VERYVVVCK  | PMSNFRF | TETHAIMG | VSL   | TWV  | MALACA | APPLI  | GW  | SRYI | PEGM | QCS  | CGVDY |
| Erythrolamprus_poeilogyrus_Rh1  | GEIALWSLVVLA | VERYVVVCK  | PMSNFRF | TETHAIMG | VSL   | TWV  | MALACA | APPLI  | GW  | SRYI | PEGM | QCS  | CGVDY |
| Helicops_modestus_Rh1           | GEIALWSLVVLA | VERYVVVCK  | PMSNFRF | TETHAIMG | VSL   | TWV  | MALACA | APPLI  | GW  | SRYI | PEGM | QCS  | CGVDY |
| Oxyrhopus_guibeii_Rh1           | GEIALWSLVVLA | AIERYVVVCK | PMSNFRF | TETHAIMG | VSL   | TWV  | MALACA | APPLV  | GW  | SRYI | PEGM | QCS  | CGVDY |
| Philodryas_patagoniensis_Rh1    | GEIALWSLVVLA | VERYVVVCK  | PMSNFRF | TETHAIMG | VSL   | TWV  | MALACA | APPLI  | GW  | SRYI | PEGM | QCS  | CGVDY |
| Python_regius_Rh1               | GEIALWSLVVLA | AIERYVVVCK | PMSNFRF | TETHAIMG | L     | CFT  | WV     | MALACA | AGP | PLV  | GW   | SRYI | PEGM  |
| Sibynomorphus_mikanii_Rh1       | GEIALWSLVVLA | AIERYVVVCK | PMSNFRF | TETHAIMG | VAF   | TWV  | MALACA | APPLV  | GW  | SRYI | PEGM | QCS  | CGIDY |
| Sibynomorphus_neuwiedii_Rh1     | GEIALWSLVVLA | AIERYVVVCK | PMSNFRF | TETHAIMG | VAF   | TWV  | MALACA | APPLV  | GW  | SRYI | PEGM | QCS  | CGIDY |
| Spilotes_pullatus_Rh1           | GEIALWSLVVLA | VERYVVVCK  | PMSNFRF | TETHAIMG | VSL   | TWV  | MALACA | APPLI  | GW  | SRYI | PEGM | QCS  | CGVDY |
| Taeniophallus_persimilis_Rh1    | GEIALWSLVVLA | VERYVVVCK  | PMSNFRF | TETHAIMG | VSL   | TWV  | MALACA | APPLV  | GW  | SRYI | PEGM | QCS  | CGVDY |
| Thamnodynastes_strigatus_Rh1    | GEIALWSLVVLA | VERYVVVCK  | PMSNFRF | TETHAIMG | VSL   | TWV  | MALACA | APPLI  | GW  | SRYI | PEGM | QCS  | CGVDY |
| Tomodon_dorsatus_Rh1            | GEIALWSLVVLA | VERYVVVCK  | PMSNFRF | TETHAIMG | VSL   | TWV  | MALACA | APPLI  | GW  | SRYI | PEGM | QCS  | CGVDY |
| Xenopeltis_unicolor_Rh1         | GEMALWSLVVLA | AIERYVVVCK | PMSNFRF | TETHAIMG | L     | AFT  | WV     | MALACA | AGP | PLV  | GW   | SRYI | PEGM  |
| Atractus_reticulatus_LWS        | GITALWSLAI   | ISWERFV    | VCKPFG  | NKFD     | AKMA  | VGGI | LFS    | WIW    | AS  | SWT  | APP  | IFG  | WS    |
| Chironius_bicarinatus_LWS       | GITALWSLAI   | ISWERV     | VVCKP   | FGNK     | FD    | AKMA | LGGI   | LFS    | WIW | AS   | CA   | WT   | APP   |
| Dipsas_petersi_LWS              | GITGLWSLAI   | ISWERFV    | VCKPFG  | NKFD     | AKMA  | VGGI | LFS    | WIW    | AS  | SWT  | APP  | PMF  | GW    |
| Echinantera_cephalostriata_LWS  | GITALWSLAI   | ISWERV     | VVCKP   | FGNK     | FD    | AKMA | MGGI   | LFS    | WIW | AS   | CA   | WT   | APP   |
| Echinantera_undulata_LWS        | GITALWSLAI   | ISWERV     | VVCKP   | FGNK     | FD    | AKMA | MGGI   | LFS    | WIW | AS   | CA   | WT   | APP   |
| Erythrolamprus_aesculapii_LWS   | GITALWSLAI   | ISWERV     | VVCKP   | FGNK     | FD    | AKMA | LGGI   | LFS    | WIW | AS   | CA   | WT   | APP   |
| Erythrolamprus_miliaris_LWS     | GITALWSLAI   | ISWERV     | VVCKP   | FGNK     | FD    | AKMA | LGGI   | LFS    | WIW | AS   | CA   | WT   | APP   |
| Erythrolamprus_poeilogyrus_LWS  | GITALWSLAI   | ISWERV     | VVCKP   | FGNK     | FD    | AKMA | VGGI   | LFS    | WIW | AS   | CA   | WT   | APP   |
| Helicops_modestus_LWS           | GITALWSLAI   | ISWERV     | VVCKP   | FGNK     | FD    | AKMA | I      | GIL    | F   | AWI  | W    | AS   | CA    |
| Oxyrhopus_guibeii_LWS           | GITGLWSLAI   | ISWERV     | VVCKP   | FGNK     | FD    | AKMA | LGGI   | LFS    | WIW | AS   | CA   | WT   | APP   |
| Philodryas_patagoniensis_LWS    | GITALWSLAI   | ISWERV     | VVCKP   | FGNK     | FD    | AKMA | LGGI   | LFS    | WIW | AS   | CA   | WT   | APP   |
| Python_regius_LWS               | GITGLWSLAI   | ISWERV     | VVCKP   | FGNK     | FD    | AKMA | LGGI   | LFS    | WIW | AS   | CA   | WT   | APP   |
| Sibynomorphus_mikanii_LWS       | GITALWSLAI   | ISWERFV    | VCKPFG  | NKFD     | AKMA  | VGGI | LFS    | WIW    | AS  | SWT  | APP  | IFG  | WS    |
| Sibynomorphus_neuwiedii_LWS     | GITGLWSLAI   | ISWERV     | VVCKP   | FGNK     | FD    | AKMA | VGGI   | LFS    | WIW | AS   | CA   | WT   | APP   |
| Spilotes_pullatus_LWS           | GITALWSLAI   | ISWERV     | VVCKP   | FGNK     | FD    | AKMA | LGGI   | LFS    | WIW | AS   | CA   | WT   | APP   |
| Taeniophallus_persimilis_LWS    | GITALWSLAI   | ISWERV     | VVCKP   | FGNK     | FD    | AKMA | MGGI   | LFS    | WIW | AS   | CA   | WT   | APP   |
| Thamnodynastes_strigatus_LWS    | GITALWSLAI   | ISWERV     | VVCKP   | FGNK     | FD    | AKMA | I      | GIL    | F   | AWI  | W    | AS   | CA    |
| Tomodon_dorsatus_LWS            | GITALWSLAI   | ISWERV     | VVCKP   | FGNK     | FD    | AKMA | VGGI   | LFS    | WIW | AS   | CA   | WT   | APP   |
| Xenopeltis_unicolor_LWS         | GITALWSLAI   | ISWERV     | VVCKP   | FGNK     | FD    | AKMA | LGGI   | LFS    | WIW | AS   | CA   | WT   | APP   |
| Atractus_reticulatus_SWS1       | GMVGTGWSL    | AF         | LA      | FERY     | IVICK | PLGN | FR     | FN     | AKH | ALVV | VVAT | TWV  | IG    |
| Chironius_bicarinatus_SWS1      | GMVGTGWSL    | AF         | LA      | FERY     | IVICK | PLGN | FR     | FN     | AKH | ALVV | VVAT | TWV  | IG    |
| Dipsas_petersi_SWS1             | GMVGTGWSL    | AF         | LA      | FERY     | IVICK | PLGN | FR     | FN     | AKH | ALVV | VVAT | TWV  | IG    |
| Echinantera_cephalostriata_SWS1 | GMVGTGWSL    | AF         | LA      | FERY     | IVICK | PLGN | FR     | FN     | AKH | ALVV | VVAT | TWV  | IG    |
| Echinantera_undulata_SWS1       | GMVGTGWSL    | AF         | LA      | FERY     | IVICK | PLGN | FR     | FN     | AKH | ALVV | VVAT | TWV  | IG    |
| Erythrolamprus_aesculapii_SWS1  | GMVGTGWSL    | AF         | LA      | FERY     | IVICK | PLGN | FR     | FN     | AKH | ALVV | VVAT | TWV  | IG    |
| Erythrolamprus_miliaris_SWS1    | GMVGTGWSL    | AF         | LA      | FERY     | IVICK | PLGN | FR     | FN     | AKH | ALVV | VVAT | TWV  | IG    |
| Erythrolamprus_poeilogyrus_SWS1 | GMVGTGWSL    | AF         | LA      | FERY     | IVICK | PLGN | FR     | FN     | AKH | ALVV | VVAT | TWV  | IG    |
| Helicops_modestus_SWS1          | GMVGTGWSL    | AF         | LA      | FERY     | IVICK | PLGN | FR     | FN     | AKH | ALVV | VVAT | TWV  | IG    |
| Oxyrhopus_guibeii_SWS1          | GMVGTGWSL    | AF         | LA      | FERY     | IVICK | PLGN | FR     | FN     | AKH | ALVV | VVAT | TWV  | IG    |
| Philodryas_patagoniensis_SWS1   | GMVGTGWSL    | AF         | LA      | FERY     | IVICK | PLGN | FR     | FN     | AKH | ALVV | VVAT | TWV  | IG    |
| Python_regius_SWS1              | GLVTGWSL     | AF         | LA      | FERY     | IVICK | PLGN | FR     | FN     | AKH | ALVV | VVAT | TWV  | IG    |
| Sibynomorphus_mikanii_SWS1      | GMVGTGWSL    | AF         | LA      | FERY     | IVICK | PLGN | FR     | FN     | AKH | ALVV | VVAT | TWV  | IG    |
| Sibynomorphus_neuwiedii_SWS1    | GMVGTGWSL    | AF         | LA      | FERY     | IVICK | PLGN | FR     | FN     | AKH | ALVV | VVAT | TWV  | IG    |
| Spilotes_pullatus_SWS1          | GLVTGWSL     | AF         | LA      | FERY     | IVICK | PLGN | FR     | FN     | AKH | ALVV | VVAT | TWV  | IG    |
| Taeniophallus_persimilis_SWS1   | GMVGTGWSL    | AF         | LA      | FERY     | IVICK | PLGN | FR     | FN     | AKH | ALVV | VVAT | TWV  | IG    |
| Thamnodynastes_strigatus_SWS1   | GMVGTGWSL    | AF         | LA      | FERY     | IVICK | PLGN | FR     | FN     | AKH | ALVV | VVAT | TWV  | IG    |
| Tomodon_dorsatus_SWS1           | GMVGTGWSL    | AF         | LA      | FERY     | IVICK | PLGN | FR     | FN     | AKH | ALVV | VVAT | TWV  | IG    |
| Xenopeltis_unicolor_SWS1        | GLVTGWSL     | AF         | LA      | FERY     | IVICK | PLGN | FR     | FN     | AKH | ALVV | VVAT | TWV  | IG    |

|                                   | 241                                                           | 250                                                          | 260                                   | 270 | 280 | 290 | 300 | 310 | 320 | 330 | 340 | 350 | 360 |
|-----------------------------------|---------------------------------------------------------------|--------------------------------------------------------------|---------------------------------------|-----|-----|-----|-----|-----|-----|-----|-----|-----|-----|
| Bos taurus_Rh1                    | ATTQKAEKEVTRMVIIMVIAFLICWLPYAGVAFYIFTHQGSDFGPIFMTIPAFFAKTS    | AVYNPVIYIMMNKQFRNCMVTTLCCGKNPLGDDEASTVSKTETSQVAPA*           |                                       |     |     |     |     |     |     |     |     |     |     |
| Atractus reticulatus_Rh1          | ATTQKAEKEVTRMVIIMVIAFLVWCWVPYASVAFYIFTHQGSDFGVPVMTIPAFFAKSSAI | YNPVIYIVMNKQFRNCMIITTLCCGKNPLA                               |                                       |     |     |     |     |     |     |     |     |     |     |
| Chironius bicarinatus_Rh1         | ATTQKAEKEVTRMVIIMVIAFLVWCWVPYASVAFYIFTHQGSDFGVPVMTIPAFFAKSSAI | YNPVIYIVMNKQFRNCMIITTLCCGKNPLVEDDTSV-GTKTETSTVSTVST          |                                       |     |     |     |     |     |     |     |     |     |     |
| Dipsas petersi_Rh1                | ATTQKAEKEVTRMVIIMVIAFLVWCWVPYASVAFYIFTHQGSDFGVPVMTIPAFFAKSSAI | YNPVIYIVMNKQFRNCMIITTLCCGKNPLAEDDTSV-GTKTETSTVSTVSTVSTVST    |                                       |     |     |     |     |     |     |     |     |     |     |
| Echinerantera cephalostriata_Rh1  | ATTQKAEKEVTRMVIIMVIAFLVWCWVPYASVAFYIFTHQGSDFGVPVMTIPAFFAKSSAI | YNPVIYIVMNKQFRNCMIITTLCCGKNPLAEDDTSV-GTKTETSTVSTVSTVSTVSTVST |                                       |     |     |     |     |     |     |     |     |     |     |
| Echinerantera undulata_Rh1        | ATTQKAEKEVTRMVIIMVIAFLVWCWVPYASVAFYIFTHQGSDFGVPVMTIPAFFAKSSAI | YNPVIYIVMNKQFRNCMIITTLCCGKNPLAEDDTSV-GTKTETSTVSTVSTVSTVSTVST |                                       |     |     |     |     |     |     |     |     |     |     |
| Erythrolamprus aesculapii_Rh1     | ATTQKAEKEVTRMVIIMVIAFLVWCWVPYASVAFYIFTHQGSDFGVPVMTIPAFFAKSSAI | YNPVIYIVMNKQFRNCMIITTLCCGKNPLAEDDTSV-GTKTETSTVSTVSTVSTVSTVST |                                       |     |     |     |     |     |     |     |     |     |     |
| Erythrolamprus miliaris_Rh1       | ATTQKAEKEVTRMVIIMVIAFLVWCWVPYASVAFYIFTHQGSDFGVPVMTIPAFFAKSSAI | YNPVIYIVMNKQFRNCMIITTLCCGKNPLAEDDTSV-GTKTETSTVSTVSTVSTVSTVST |                                       |     |     |     |     |     |     |     |     |     |     |
| Erythrolamprus poecilogyrus_Rh1   | ATTQKAEKEVTRMVIIMVIAFLVWCWVPYASVAFYIFTHQGSDFGVPVMTIPAFFAKSSAI | YNPVIYIVMNKQFRNCMIITTLCCGKNPLAEDDTSV-GTKTETSTVSTVSTVSTVSTVST |                                       |     |     |     |     |     |     |     |     |     |     |
| Helicops modestus_Rh1             | ATTQKAEKEVTRMVIIMVIAFLVWCWVPYASVAFYIFTHQGSDFGVPVMTIPAFFAKSSAI | YNPVIYIVMNKQFRNCMIITTLCCGKNPLAEDDTSV-GTKTETSTVSTVSTVSTVSTVST |                                       |     |     |     |     |     |     |     |     |     |     |
| Oxyrhopus guibei_Rh1              | ATTQKAEKEVTRMVIIMVIAFLVWCWVPYASVAFYIFTHQGSDFGVPVMTIPAFFAKSSAI | YNPVIYIVMNKQFRNCMIITTLCCGKNPLAEDDTSV-GTKTETSTVSTVSTVSTVSTVST |                                       |     |     |     |     |     |     |     |     |     |     |
| Philodryas patagoniensis_Rh1      | ATTQKAEKEVTRMVIIMVIAFLVWCWVPYASVAFYIFTHQGSDFGVPVMTIPAFFAKSSAI | YNPVIYIVMNKQFRNCMIITTLCCGKNPLAEDDTSV-GTKTETSTVSTVSTVSTVSTVST |                                       |     |     |     |     |     |     |     |     |     |     |
| Python regius_Rh1                 | ATTQKAEKEVTRMVIIMVIAFLVWCWVPYASVAFYIFTHQGSDFGVPVMTIPAFFAKSSAI | YNPVIYIVLNKQFRNCMIITTLCCGKNPLAEDDTSV-GTKTETSTVSTVSTVSTVSTVST |                                       |     |     |     |     |     |     |     |     |     |     |
| Sibynomorphus mikanii_Rh1         | ATTQKAEKEVTRMVIIMVIAFLVWCWVPYASVAFYIFTHQGSDFGVPVMTIPAFFAKSSAI | YNPVIYIVMNKQFRNCMIITTLCCGKNPLAEDDTSV-GTKTETSTVSTVSTVSTVSTVST |                                       |     |     |     |     |     |     |     |     |     |     |
| Sibynomorphus neuwiedi_Rh1        | ATTQKAEKEVTRMVIIMVIAFLVWCWVPYASVAFYIFTHQGSDFGVPVMTIPAFFAKSSAI | YNPVIYIVMNKQFRNCMIITTLCCGKNPLAEDDTSV-GTKTETSTVSTVSTVSTVSTVST |                                       |     |     |     |     |     |     |     |     |     |     |
| Spilotes pullatus_Rh1             | ATTQKAEKEVTRMVIIMVIAFLVWCWVPYASVAFYIFTHQGSDFGVPVMTIPAFFAKSSAI | YNPVIYIVMNKQFRNCMIITTLCCGKNPLAEDDTSV-GTKTETSTVSTVSTVSTVSTVST |                                       |     |     |     |     |     |     |     |     |     |     |
| Taeniophallus persimilis_Rh1      | ATTQKAEKEVTRMVIIMVIAFLVWCWVPYASVAFYIFTHQGSDFGVPVMTIPAFFAKSSAI | YNPVIYIVMNKQFRNCMIITTLCCGKNPLAEDDTSV-GTKTETSTVSTVSTVSTVSTVST |                                       |     |     |     |     |     |     |     |     |     |     |
| Thamnodynastes strigatus_Rh1      | ATTQKAEKEVTRMVIIMVIAFLVWCWVPYASVAFYIFTHQGSDFGVPVMTIPAFFAKSSAI | YNPVIYIVMNKQFRNCMIITTLCCGKNPLAEDDTSV-GTKTETSTVSTVSTVSTVSTVST |                                       |     |     |     |     |     |     |     |     |     |     |
| Tomodon dorsatus_Rh1              | ATTQKAEKEVTRMVIIMVIAFLVWCWVPYASVAFYIFTHQGSDFGVPVMTIPAFFAKSSAI | YNPVIYIVMNKQFRNCMIITTLCCGKNPLAEDDTSV-GTKTETSTVSTVSTVSTVSTVST |                                       |     |     |     |     |     |     |     |     |     |     |
| Xenopeltis unicolor_Rh1           | ATTQKAEKEVTRMVIIMVIAFLVWCWVPYASVAFYIFTHQGSDFGVPVMTIPAFFAKSSAI | YNPVIYIVLNKQFRNCMIITTLCCGKNPLAEDDTSV-GTKTETSTVSTVSTVSTVSTVST |                                       |     |     |     |     |     |     |     |     |     |     |
| Atractus reticulatus_LWS          | ESTQKAEKEVSRMVMVMI IAY I ICWGPYATFFACFAANPGYAFHPLTASMPAFFAKS  | ATIYNPIIYVFMNRQFRNCIMQLFGQES                                 |                                       |     |     |     |     |     |     |     |     |     |     |
| Chironius bicarinatus_LWS         | ESTQKAEKEVSRMVMVMI IAY I ICWGPYATFFACFAANPGYAFHPLTASMPAFFAKS  | ATIYNPIIYVFMNRQFRNCIMQLX                                     |                                       |     |     |     |     |     |     |     |     |     |     |
| Dipsas petersi_LWS                | ESTQKAEKEVSRMVMVMI IAY I ICWGPYATFFACFAANPGYAFHPLTASMPAFFAKS  | ATIYNPIIYVFMNRQFRNCIMQLFGKKVX                                |                                       |     |     |     |     |     |     |     |     |     |     |
| Echinerantera cephalostriata_LWS  | ESTQKAEKEVSRMVMVMI IAY I ICWGPYATFFACFAANPGYAFHPLTASMPAFFAKS  | ATIYNPIIYVFMNRQFRNCIMQLX                                     |                                       |     |     |     |     |     |     |     |     |     |     |
| Echinerantera undulata_LWS        | ESTQKAEKEVSRMVMVMI IAY I ICWGPYATFFACFAANPGYAFHPLTASMPAFFAKS  | ATIYNPIIYVFMNRQFRNCIMQLX                                     |                                       |     |     |     |     |     |     |     |     |     |     |
| Erythrolamprus aesculapii_LWS     | ESTQKAEKEVSRMVMVMI IAY I ICWGPYATFFACFAANPGYAFHPLTASMPAFFAKS  | ATIYNPIIYVFMNRQFRNCIMQLX                                     |                                       |     |     |     |     |     |     |     |     |     |     |
| Erythrolamprus miliaris_LWS       | ESTQKAEKEVSRMVMVMI IAY I ICWGPYATFFACFAANPGYAFHPLTASMPAFFAKS  | ATIYNPIIYVFMNRQFRNCIMQLX                                     |                                       |     |     |     |     |     |     |     |     |     |     |
| Erythrolamprus poecilogyrus_LWS   | ESTQKAEKEVSRMVMVMI IAY I ICWGPYATFFACFAANPGYAFHPLTASMPAFFAKS  | ATIYNPIIYVFMNRQFRNCIMQLX                                     |                                       |     |     |     |     |     |     |     |     |     |     |
| Helicops modestus_LWS             | ESTQKAEKEVSRMVMVMI IAY I ICWGPYATFFACFAANPGYAFHPLTASMPAFFAKS  | ATIYNPIIYVFMNRQFRNCIMQLX                                     |                                       |     |     |     |     |     |     |     |     |     |     |
| Oxyrhopus guibei_LWS              | ESTQKAEKEVSRMVMVMI IAY I ICWGPYATFFACFAANPGYAFHPLTASMPAFFAKS  | ATIYNPIIYVFMNRQFRNCIMQLFGKKV                                 |                                       |     |     |     |     |     |     |     |     |     |     |
| Philodryas patagoniensis_LWS      | ESTQKAEKEVSRMVMVMI IAY I ICWGPYATFFACFAANPGYAFHPLTASMPAFFAKS  | ATIYNPIIYVFMNRQFRNCIMQLX                                     |                                       |     |     |     |     |     |     |     |     |     |     |
| Python regius_LWS                 | ESTQKAEKEVSRMVMVMI IAY I ICWGPYATFFACFAANPGYAFHPLTASMPAFFAKS  | ATIYNPIIYVFMNRQFRNCIMQLX                                     |                                       |     |     |     |     |     |     |     |     |     |     |
| Sibynomorphus mikanii_LWS         | ESTQKAEKEVSRMVMVMI IAY I ICWGPYATFFACFAANPGYAFHPLTASMPAFFAKS  | ATIYNPIIYVFMNRQFRNCIMQLX                                     |                                       |     |     |     |     |     |     |     |     |     |     |
| Sibynomorphus neuwiedi_LWS        | ESTQKAEKEVSRMVMVMI IAY I ICWGPYATFFACFAANPGYAFHPLTASMPAFFAKS  | ATIYNPIIYVFMNRQFRNCIMQLX                                     |                                       |     |     |     |     |     |     |     |     |     |     |
| Spilotes pullatus_LWS             | ESTQKAEKEVSRMVMVMI IAY I ICWGPYATFFACFAANPGYAFHPLTASMPAFFAKS  | ATIYNPIIYVFMNRQFRNCIMQLX                                     |                                       |     |     |     |     |     |     |     |     |     |     |
| Taeniophallus persimilis_LWS      | ESTQKAEKEVSRMVMVMI IAY I ICWGPYATFFACFAANPGYAFHPLTASMPAFFAKS  | ATIYNPIIYVFMNRQFRNCIMQLX                                     |                                       |     |     |     |     |     |     |     |     |     |     |
| Thamnodynastes strigatus_LWS      | ESTQKAEKEVSRMVMVMI IAY I ICWGPYATFFACFAANPGYAFHPLTASMPAFFAKS  | ATIYNPIIYVFMNRQFRNCIMQLX                                     |                                       |     |     |     |     |     |     |     |     |     |     |
| Tomodon dorsatus_LWS              | ESTQKAEKEVSRMVMVMI IAY I ICWGPYATFFACFAANPGYAFHPLTASMPAFFAKS  | ATIYNPIIYVFMNRQFRNCIMQLX                                     |                                       |     |     |     |     |     |     |     |     |     |     |
| Xenopeltis unicolor_LWS           | ESTQKAEKEVSRMVMVMI IAY I ICWGPYATFFACFAANPGYAFHPLTASMPAFFAKS  | ATIYNPIIYVFMNRQFRNCIMQLFGKKVDDGSEVSSSTRTEVSSVSSNSVSPA*       |                                       |     |     |     |     |     |     |     |     |     |     |
| Atractus reticulatus_SWS1         | ATTQKAEREVSRMVMVMVASFCICYVPAALAMYMVNNPHHGFDLRLVTI             | PAFFSKSSCVYNPIIYCFMKNQFRACIMETVC-GKPI                        | DDSDVSX-XQKTXVSSASSCQVS               |     |     |     |     |     |     |     |     |     |     |
| Chironius bicarinatus_SWS1        | ATTQKAEREVSRMVMVMVASFCICYVPAALAMYMVNNPHHGFDLRLVTI             | PAFFSKSSCVYNPIIYCFMKNQFRACIMETVC-GKPM                        | DDSDAVX-XQKTEVSSASSCQVSP              |     |     |     |     |     |     |     |     |     |     |
| Dipsas petersi_SWS1               | ATTQKAEREVSRMVMVMVASFCICYVPAALAMYMVNNPHHGFDLRLVTI             | PAFFSKSSCVYNPIIYCFMKNQFRACIMETVC-GKPM                        | DESLSX-XQKTEVSSASSCQVSSX              |     |     |     |     |     |     |     |     |     |     |
| Echinerantera cephalostriata_SWS1 | ATTQKAEREVSRMVMVMVASFCICYVPAALAMYMVNNPHHGFDLRLVTI             | PAFFSKSSCVYNPIIYCFMKNQFRACIMETVC-GKPM                        | DESVDVT                               |     |     |     |     |     |     |     |     |     |     |
| Echinerantera undulata_SWS1       | ATTQKAEREVSRMVMVMVASFCICYVPAALAMYMVNNPHHGFDLRLVTI             | PAFFSKSSCVYNPIIYCFMKNQFRACIMETVC-GKPM                        | DDSDVTX-XSK                           |     |     |     |     |     |     |     |     |     |     |
| Erythrolamprus aesculapii_SWS1    | ATTQKAEREVSRMVMVMVASFCICYVPAALAMYMVNNPHHGFDLRLVTI             | PAFFSKSSCVYNPIIYCFMKNQFRACIMETVC-GKPM                        | DESVDVT                               |     |     |     |     |     |     |     |     |     |     |
| Erythrolamprus miliaris_SWS1      | ATTQKAEREVSRMVMVMVASFCICYVPAALAMYMVNNPHHGFDLRLVTI             | PAFFSKSSCVYNPIIYCFMKNQFRACIMETVC-GKPM                        | DDSDVX                                |     |     |     |     |     |     |     |     |     |     |
| Erythrolamprus poecilogyrus_SWS1  | ATTQKAEREVSRMVMVMVASFCICYVPAALAMYMVNNPHHGFDLRLVTI             | PAFFSKSSCVYNPIIYCFMKNQFRACIME                                |                                       |     |     |     |     |     |     |     |     |     |     |
| Helicops modestus_SWS1            | ATTQKAEREVSRMVMVMVASFCICYVPAALAMYMVNNPHHGFDLRLVTI             | PAFFSKSSCVYNPIIYCFMKNQFRACIMETVC-GKPM                        | DDSDVSX-XQKTEVSSASSCQVS               |     |     |     |     |     |     |     |     |     |     |
| Oxyrhopus guibei_SWS1             | ATTQKAEREVSRMVMVMVASFCICYVPAALAMYMVNNPHHGFDLRLVTI             | PAFFSKSSCVYNPIIYCFMKNQFRACIMEMVC-GK                          |                                       |     |     |     |     |     |     |     |     |     |     |
| Philodryas patagoniensis_SWS1     | ATTQKAEREVSRMVMVMVASFCICYVPAALAMYMVNNPHHGFDLRLVTI             | PAFFSKSSCVYNPIIYCFMKNQFRACI                                  |                                       |     |     |     |     |     |     |     |     |     |     |
| Python regius_SWS1                | ATTQKAEREVSRMVMVMVASFCICYVPAALAMYMVNNPHHGFDLRLVTI             | PAFFSKSSCVYNPIIYCFMKNQFRACIMQTV                              | CG-LTEESDAGSSAQKTEVSSVSSSQVSPSSGAG--- |     |     |     |     |     |     |     |     |     |     |
| Sibynomorphus mikanii_SWS1        | ATTQKAEREVSRMVMVMVASFCICYVPAALAMYMVNNPHHGFDLRLVTI             | PAFFSKSSCVYNPIIYCFMKNQFRACIMETVC-GKPM                        | DESLSX                                |     |     |     |     |     |     |     |     |     |     |
| Sibynomorphus neuwiedi_SWS1       | ATTQKAEREVSRMVMVMVASFCICYVPAALAMYMVNNPHHGFDLRLVTI             | PAFFSKSSCVYNPIIYCFMKNQFRACIMETVC-GKPM                        | DESVDVT-XQKTEVSSV                     |     |     |     |     |     |     |     |     |     |     |
| Spilotes pullatus_SWS1            | ATTQKAEREVSRMVMVMVASFCICYVPAALAMYMVNNPHHGFDLRLVTI             | PAFFSKSSCVYNPIIYCFMKNQFRACIMETVC-GKPM                        | DDSDVT                                |     |     |     |     |     |     |     |     |     |     |
| Taeniophallus persimilis_SWS1     | ATTQKAEREVSRMVMVMVASFCICYVPAALAMYMVNNPHHGFDLRLVTI             | PAFFSKSSCVYNPIIYCFMKNQFRACIMETVC-GKPM                        | DESVDVT                               |     |     |     |     |     |     |     |     |     |     |
| Thamnodynastes strigatus_SWS1     | ATTQKAEREVSRMVMVMVASFCICYVPAALAMYMVNNPHHGFDLRLVTI             | PAFFSKSSCVYNPIIYCFMKNQFRACIMETVC-GKPM                        | DDSDV                                 |     |     |     |     |     |     |     |     |     |     |
| Tomodon dorsatus_SWS1             | ATTQKAEREVSRMVMVMVASFCICYVPAALAMYMVNNPHHGFDLRLVTI             | PAFFSKSSCVYNPIIYCFMKNQFRACIMETVC-GKPM                        | DDSDVTX-XQKTEVSSVSSCQVSP              |     |     |     |     |     |     |     |     |     |     |
| Xenopeltis unicolor_SWS1          | ATTQKAEREVSRMVMVMVASFCICYVPAALAMYMVNNPHHGFDLRLVTI             | PAFFSKSSCVYNPIIYCFMKNQFRACIMETVC-GKPL                        | TESDAGSSVQKTEVSSVSSCQVSPSSGAGTTG      |     |     |     |     |     |     |     |     |     |     |
